# Supplementary material for: Can Serendipity Still Hold Any Surprises in the Coordination Chemistry of Mixed-Donor Macrocyclic ligands? The Case Study of Pyridine-Containing 12-Membered Macrocycles and Platinum Group Metal ions PdII, PtII, and RhIII
Source: PubMed Central journal article supplement (PMC7956204; doi:10.3390/molecules26051286), 2021-02-27
Supplement: molecules-26-01286-s001.pdf [file molecules-26-01286-s001.pdf]

# Can Serendipity Still Hold Any Surprises in the Coordination Chemistry of Mixed Donor Macrocyclic ligands? The Case Study of Pyridine-Containing 12-Membered Macrocycles and Platinum Group Metal Ions Pd<sup>II</sup>, Pt<sup>II</sup>, and Rh<sup>III</sup>

Alessandra Garau, Giacomo Picci, Massimiliano Arca, Alexander J. Blake, Claudia Caltagirone, Greta De Filippo, Francesco Demartin, Francesco Isaia, Vito Lippolis,\* Anna Pintus, Andrea M. Scorciapino M. Carla Aragoni

## Supplementary Information

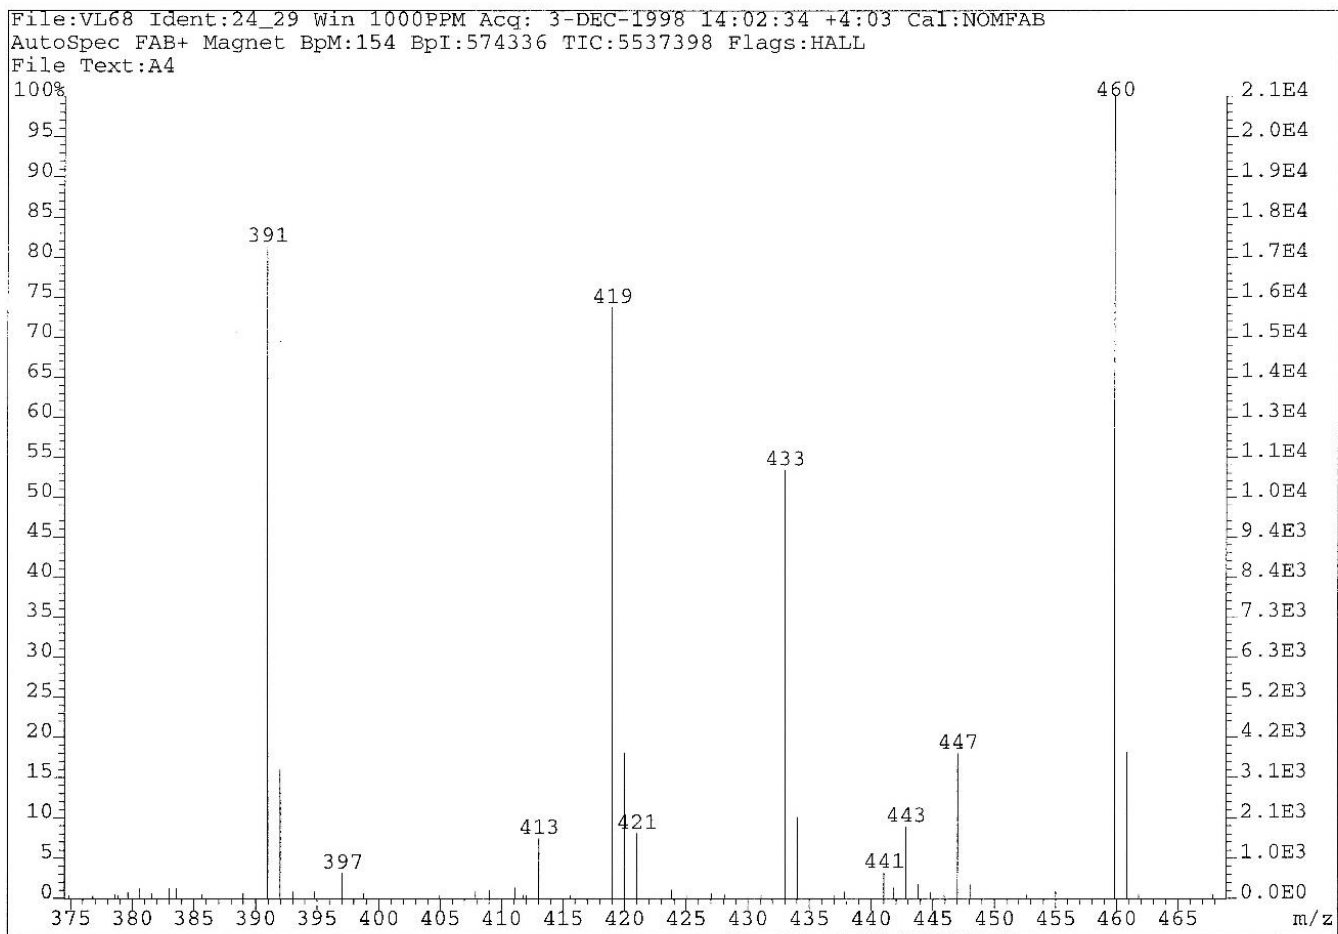

Figure S1. FAB Mass Spectrum of  $[\text{Pd}(\text{L}')\text{Cl}]_2[\text{Pd}_2\text{Cl}_6]$ .

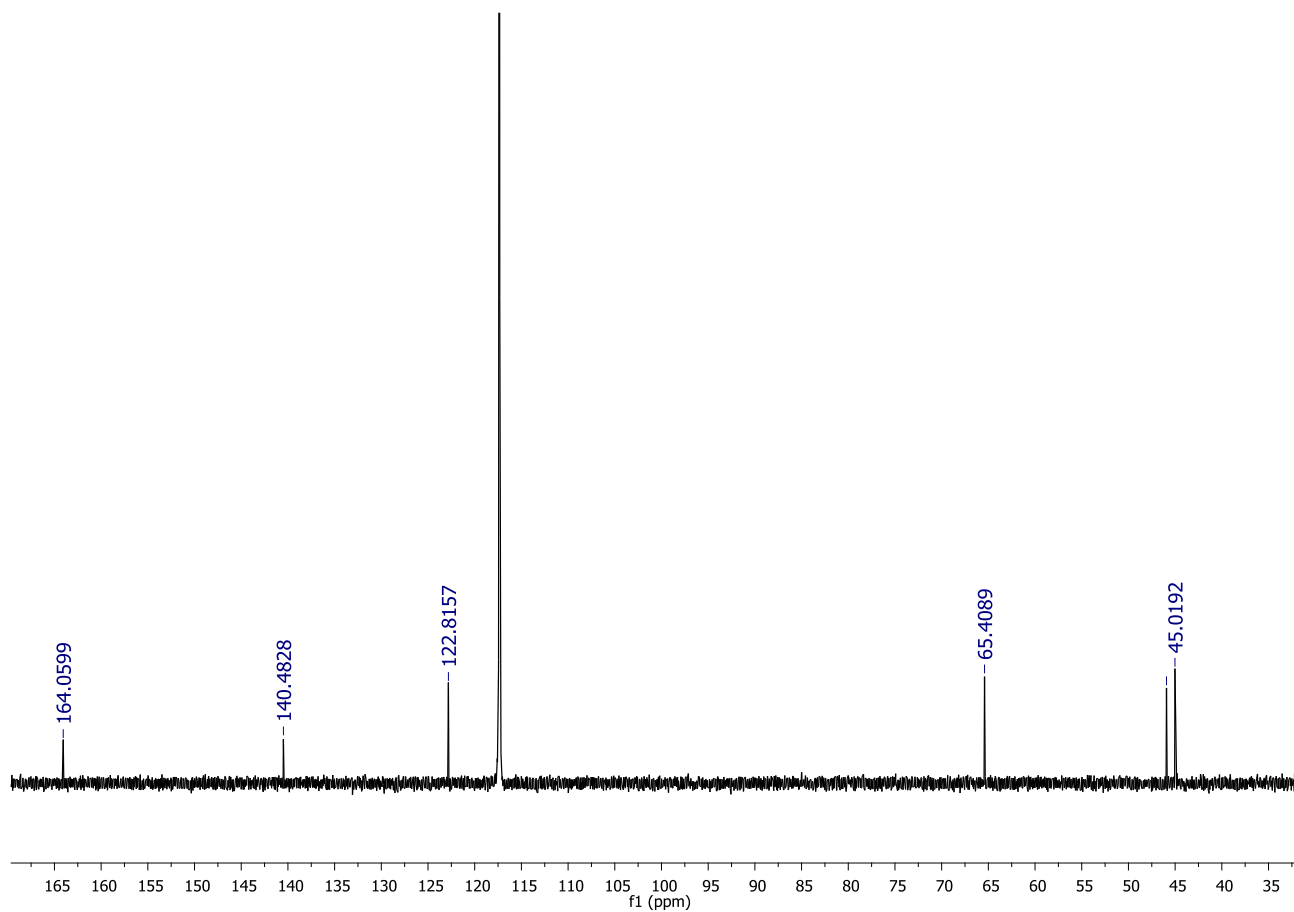

**Figure S2.**  $^{13}\text{C}$ -NMR of  $[\text{Pd}(\text{L}^1)\text{Cl}]_2[\text{Pd}_2\text{Cl}_6]$  recorded in  $\text{CD}_3\text{CN}$  (150.9 MHz).

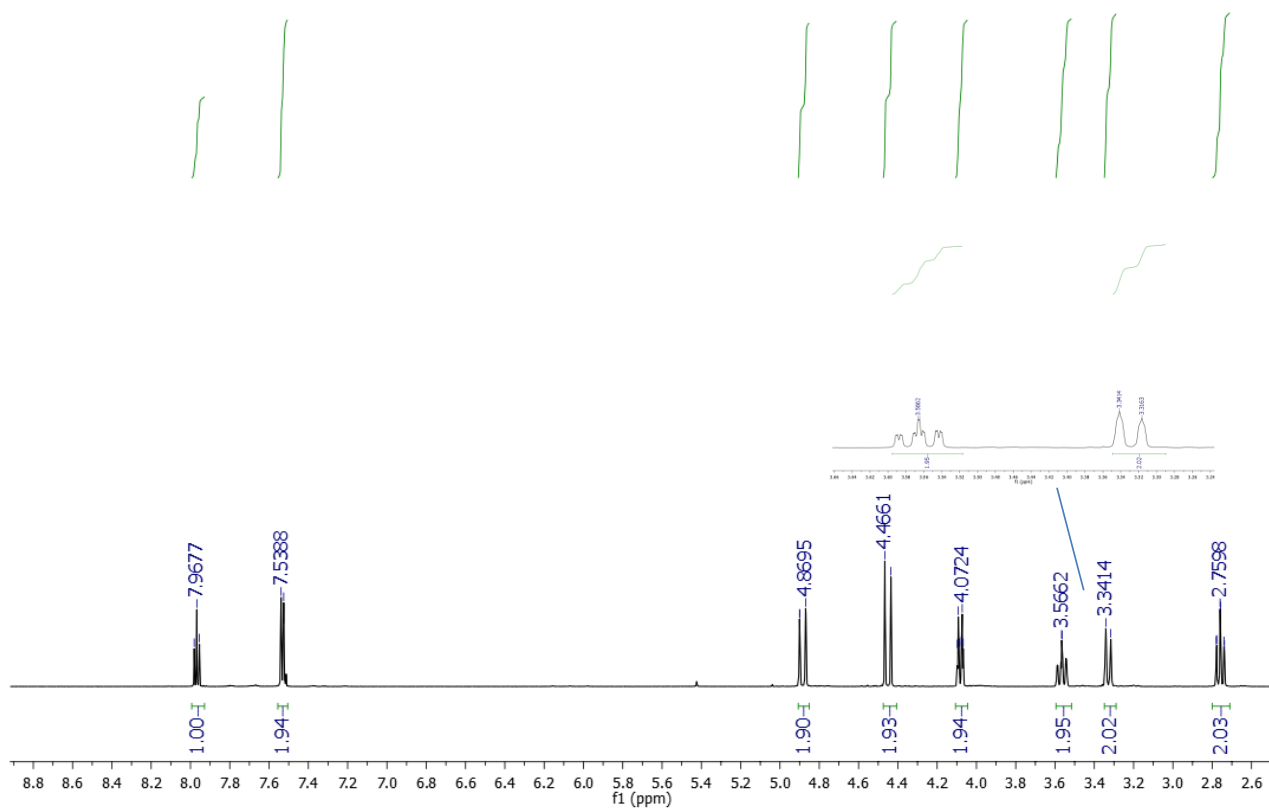

**Figure S3.**  $^1\text{H-NMR}$  of  $[\text{Pd}(\text{L}^1)\text{Cl}]_2[\text{Pd}_2\text{Cl}_6]$  recorded in  $\text{CD}_3\text{CN}$  (600 MHz). In the inset an enlargement of the region 3.20-3.60 ppm.

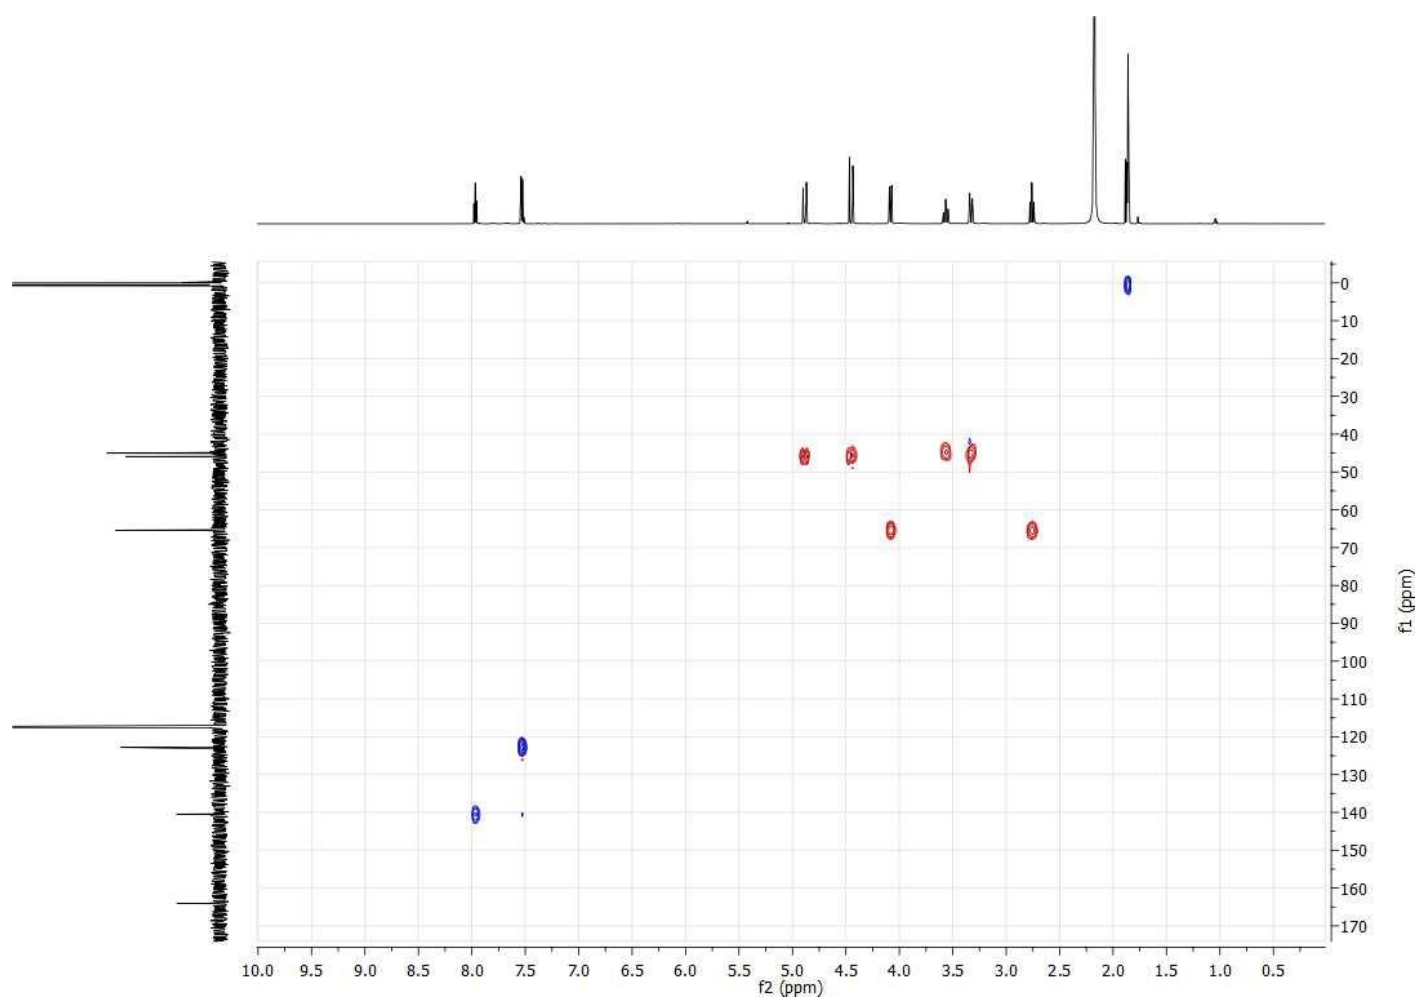

**Figure S4.**  $^1\text{H}$ - $^{13}\text{C}$  HSQC spectrum of  $[\text{Pd}(\text{L}^1)\text{Cl}]_2[\text{Pd}_2\text{Cl}_6]$  recorded in  $\text{CD}_3\text{CN}$  on a Bruker Avance III HD 600 MHz spectrometer.

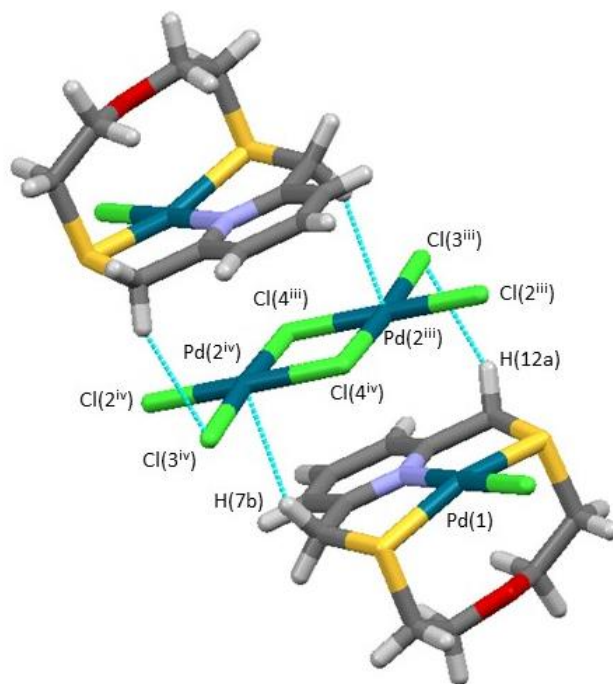

**Figure S5.** Details of the crystal packing of  $[\text{Pd}(\text{L}^1)\text{Cl}]_2[\text{Pd}_2\text{Cl}_6]$ .  $\text{Cl}3^{\text{iii}}\cdots\text{H}12\text{a}$  2.71,  $\text{Cl}3^{\text{iii}}\cdots\text{C}12$  3.606(6) Å,  $\text{Cl}3^{\text{iii}}\cdots\text{H}12\text{a}\cdots\text{C}12$  154°;  $\text{Pd}2^{\text{iv}}\cdots\text{H}7\text{b}$  2.67,  $\text{Pd}2^{\text{iv}}\cdots\text{C}7$  3.535(5) Å,  $\text{Pd}2^{\text{iv}}\cdots\text{H}7\text{b}\cdots\text{C}7$  149°. Symmetry codes:  $\text{iii} = -x, 1-y, 1-z$ ;  $\text{iv} = x, -1+y, z$ .

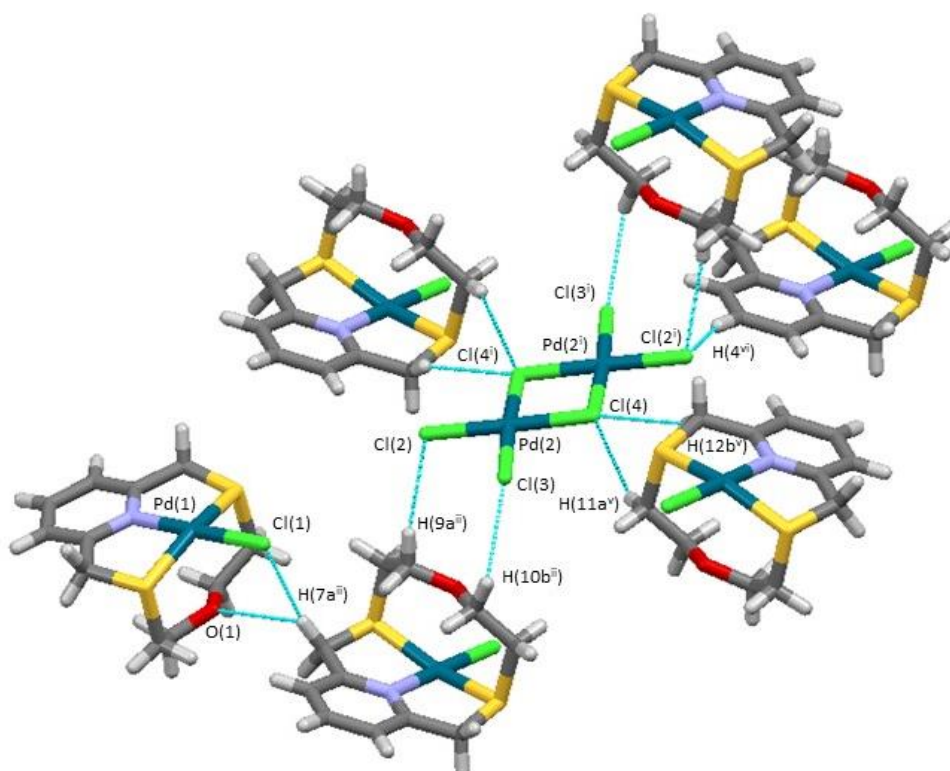

**Figure S6.** Details of the crystal packing of  $[\text{Pd}(\text{L}^1)\text{Cl}]_2[\text{Pd}_2\text{Cl}_6]$ .  $\text{Cl}1\cdots\text{H}7\text{a}^{\text{iv}}$  2.73,  $\text{Cl}1\cdots\text{C}7^{\text{ii}}$  3.676(5) Å,  $\text{Cl}1\cdots\text{H}7\text{a}^{\text{ii}}\cdots\text{C}7^{\text{ii}}$  154°;  $\text{O}1\cdots\text{H}7\text{a}^{\text{iv}}$  2.80,  $\text{O}1\cdots\text{C}7^{\text{ii}}$  3.349(5) Å,  $\text{O}1\cdots\text{H}7\text{a}^{\text{ii}}\cdots\text{C}7^{\text{ii}}$  117°;  $\text{Cl}2\cdots\text{H}9\text{a}^{\text{iv}}$  2.87,  $\text{Cl}2\cdots\text{C}9^{\text{ii}}$  3.651(5) Å,  $\text{Cl}2\cdots\text{H}9\text{a}^{\text{ii}}\cdots\text{C}9^{\text{ii}}$  138°;  $\text{Cl}3\cdots\text{H}10\text{b}^{\text{ii}}$  2.89,  $\text{Cl}3\cdots\text{C}10^{\text{ii}}$  3.701(5) Å,  $\text{Cl}3\cdots\text{H}10\text{b}^{\text{ii}}\cdots\text{C}10^{\text{ii}}$  142°;  $\text{Cl}4\cdots\text{H}12\text{b}^{\text{vi}}$  2.76,  $\text{Cl}4\cdots\text{C}12^{\text{v}}$  3.500(4) Å,  $\text{Cl}4\cdots\text{H}12\text{b}^{\text{v}}\cdots\text{C}12^{\text{v}}$  133°;  $\text{Cl}4\cdots\text{H}11\text{a}^{\text{v}}$  2.83,  $\text{Cl}4\cdots\text{C}11^{\text{v}}$  3.640(4) Å,  $\text{Cl}4\cdots\text{H}11\text{a}^{\text{v}}\cdots\text{C}11^{\text{v}}$  142°;  $\text{Cl}2^{\text{i}}\cdots\text{H}4^{\text{vi}}$  2.80,  $\text{Cl}2^{\text{i}}\cdots\text{C}4^{\text{vi}}$  3.685(5) Å,  $\text{Cl}2^{\text{i}}\cdots\text{H}4^{\text{vi}}\cdots\text{C}4^{\text{vi}}$  159°. Symmetry codes:  $\text{i} = x, 1+y, z$ ;  $\text{ii} = \frac{1}{2}-x, \frac{1}{2}+y, \frac{1}{2}-z$ ;  $\text{v} = x-\frac{1}{2}, \frac{3}{2}-y, z-\frac{1}{2}$ ;  $\text{vi} = -\frac{1}{2}+x, \frac{1}{2}-y, -\frac{1}{2}+z$ .

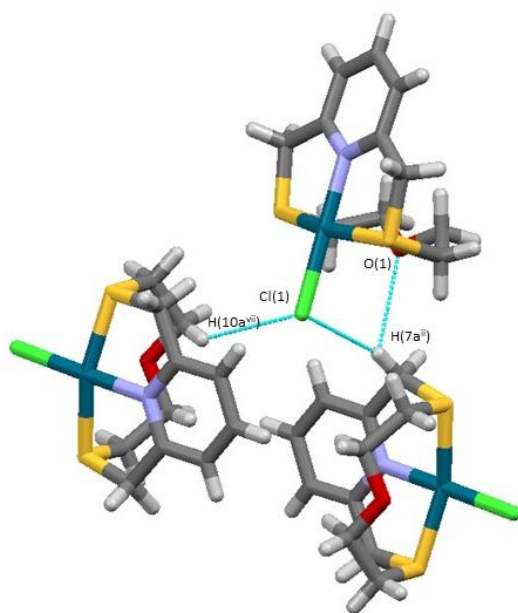

**Figure S7.** Details of the crystal packing of  $[\text{Pd}(\text{L}^1)\text{Cl}]_2[\text{Pd}_2\text{Cl}_6]$ .  $\text{Cl1}\cdots\text{H10}^{\text{vii}}$  2.85,  $\text{Cl1}\cdots\text{C10}^{\text{vii}}$  3.548(4) Å,  $\text{Cl1}\cdots\text{H10}^{\text{vii}}-\text{C10}^{\text{vii}}$  130°. Symmetry code:  $\text{vii} = \frac{1}{2} + x, \frac{1}{2} - y, \frac{1}{2} + z$ .

File:VL65 Ident:8\_12 Win 1000PPM Acq: 3-DEC-1998 11:26:10 +1:37 Cal:NOMFAB  
AutoSpec FAB+ Magnet BpM:93 BpI:839014 TIC:2994108 Flags:HALL  
File Text:A3

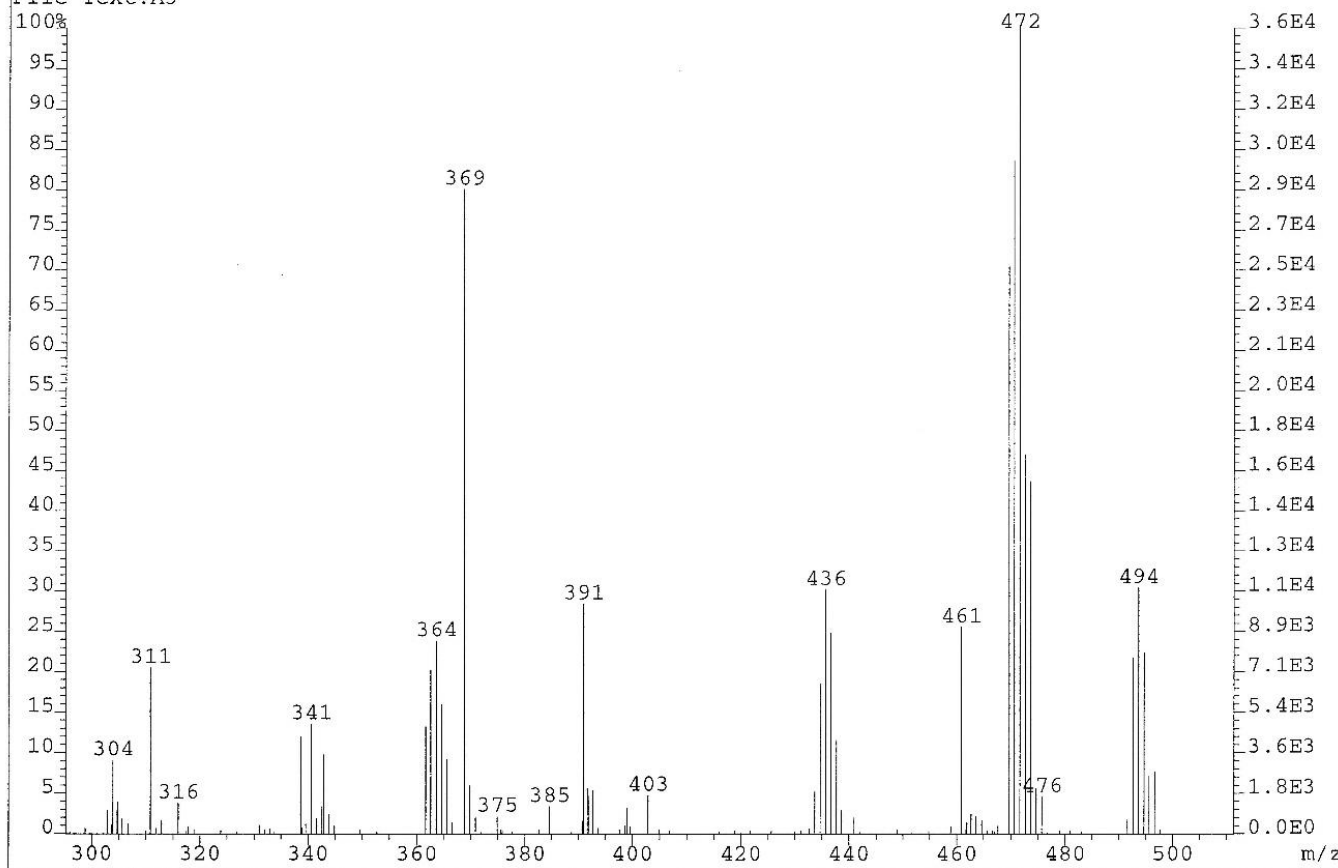

Figure S8. FAB Mass Spectrum of  $[\text{Pt}(\text{L}^1)\text{Cl}](\text{BF}_4)$ .



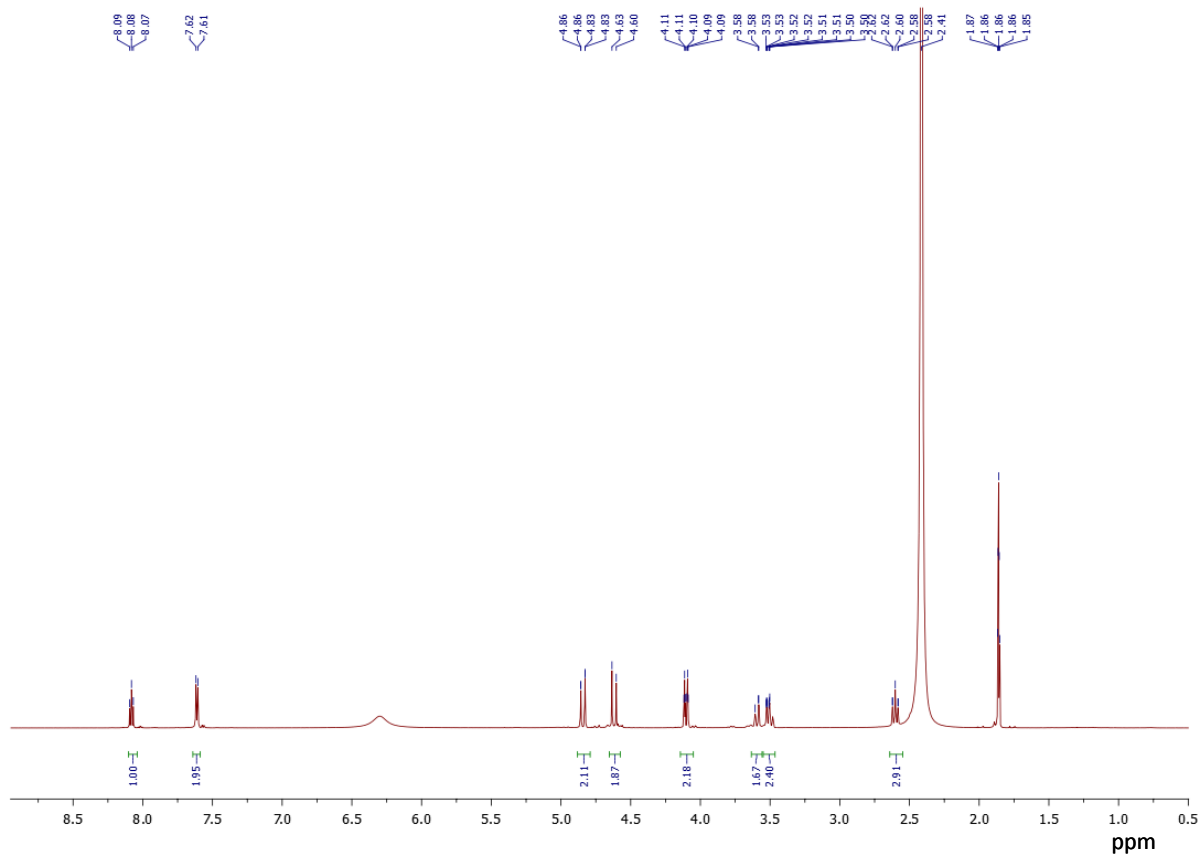

**Figure S9.**  $^1\text{H-NMR}$  of  $[\text{Pt}(\text{L}^1)\text{Cl}](\text{BF}_4)$  recorded in  $\text{CD}_3\text{CN}$  (600 MHz). The broad peak at 6.3 ppm can be assigned to a tiny impurity of ammonium ions.

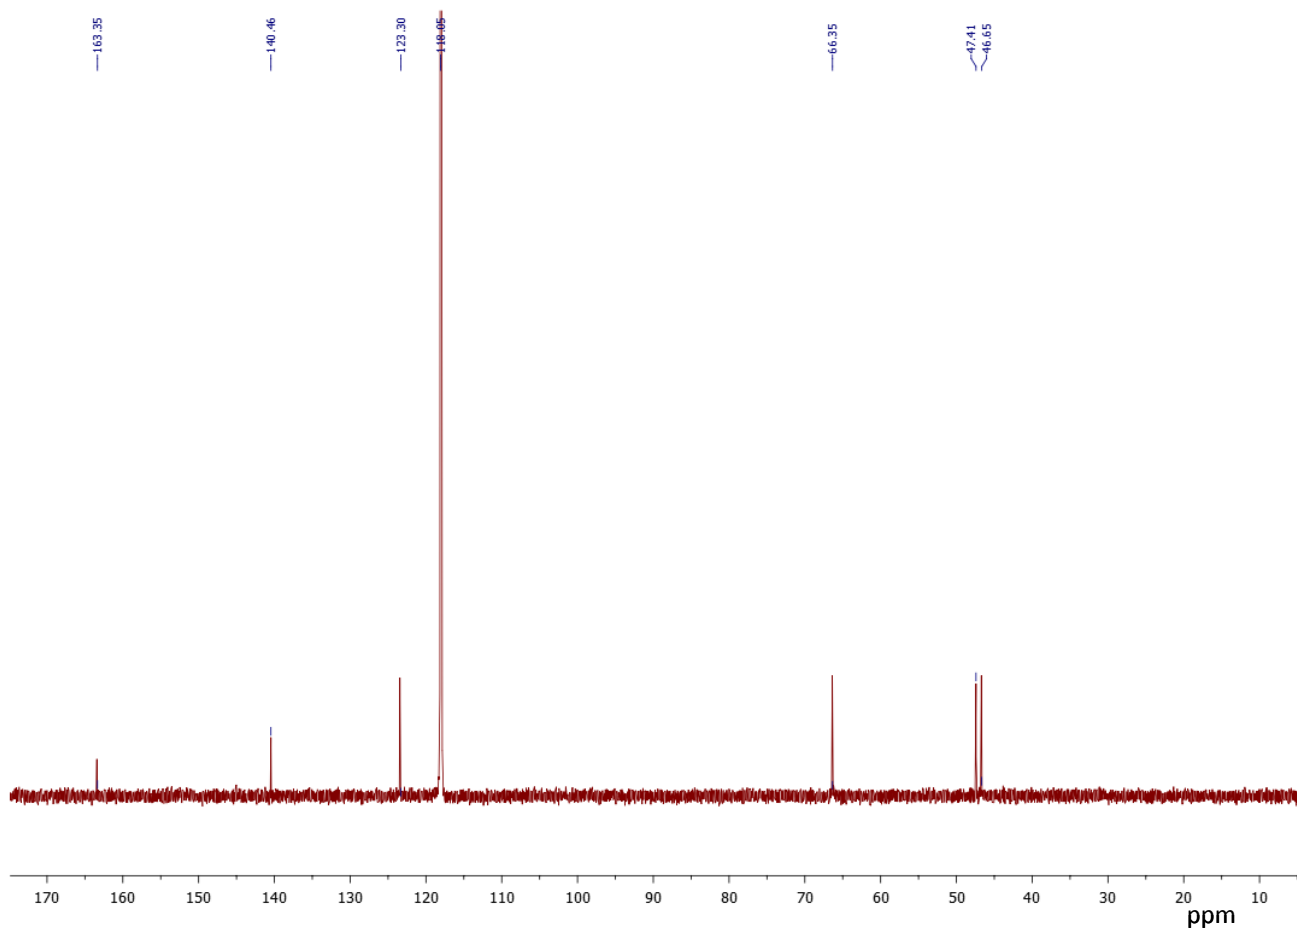

**Figure S10.**  $^{13}\text{C}$ -NMR of  $[\text{Pt}(\text{L}^1)\text{Cl}](\text{BF}_4)$  recorded in  $\text{CD}_3\text{CN}$  (150.9 MHz).

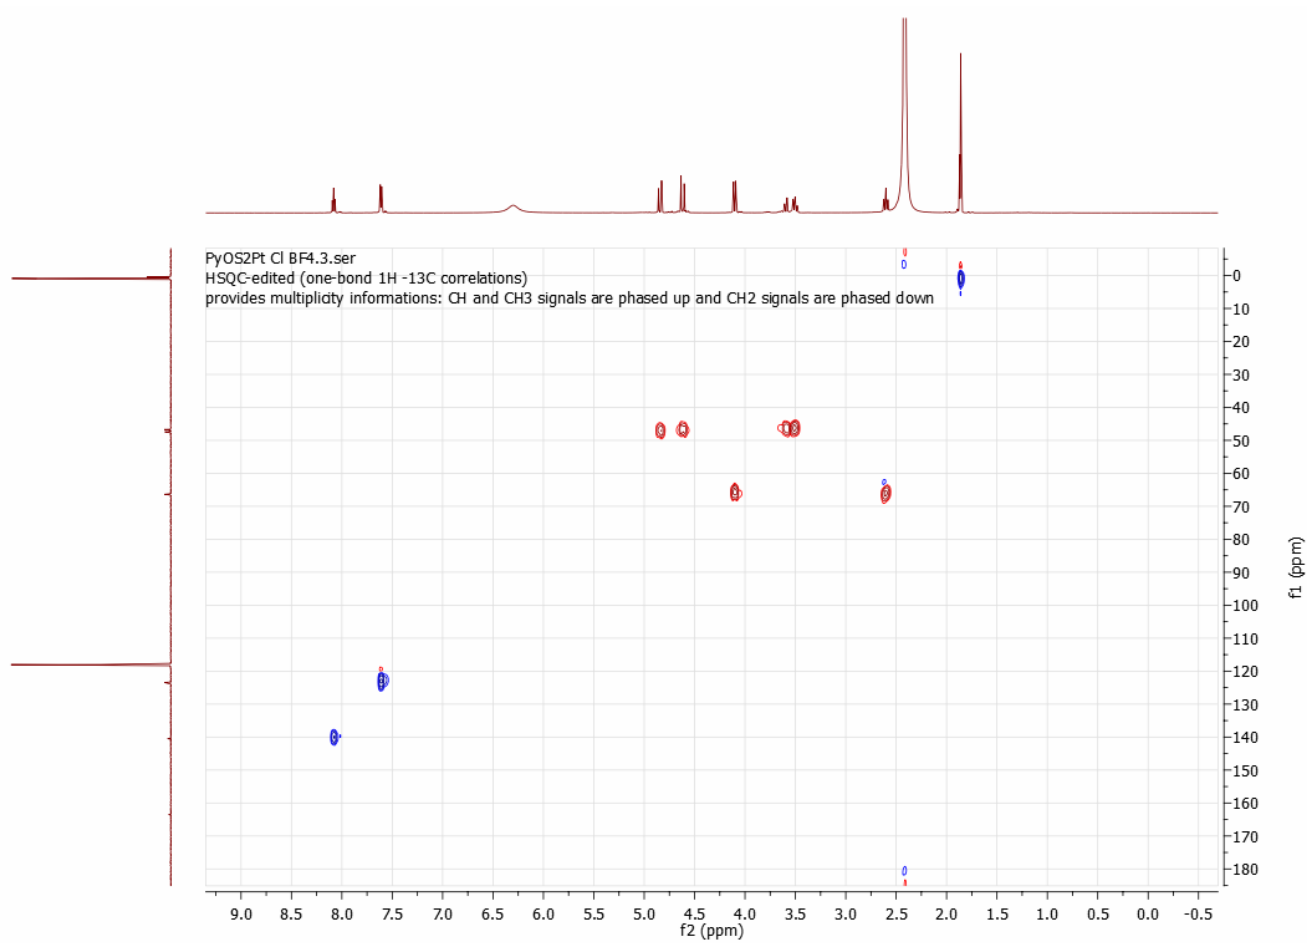

**Figure S11.**  $^1\text{H}$ - $^{13}\text{C}$  HSQC spectrum of  $[\text{Pt}(\text{L}^1)\text{Cl}](\text{BF}_4)$  recorded in  $\text{CD}_3\text{CN}$  on a Bruker Avance III HD 600 MHz spectrometer.

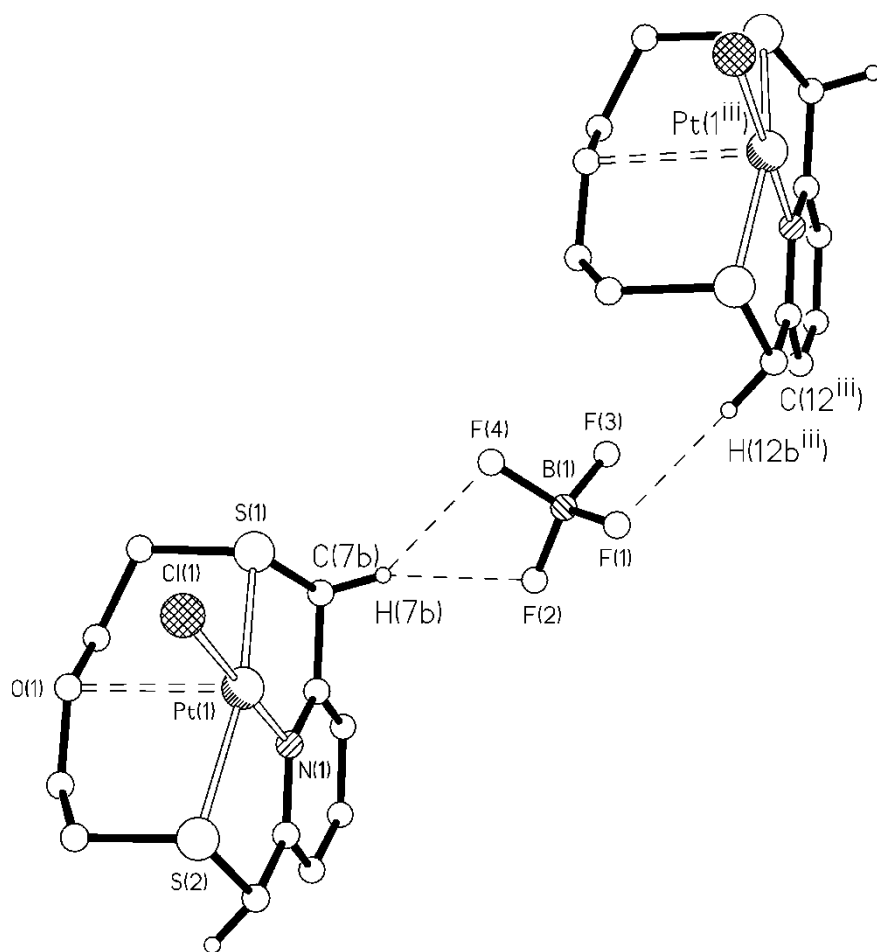

**Figure S12.** Partial view of the packing along the [010] direction for the compound [Pt(L<sup>1</sup>)Cl](BF<sub>4</sub>). Only H atoms involved in the relevant H-bonds are shown for clarity. F1...H12b<sup>iii</sup> 2.39, F1...C12<sup>iii</sup> 3.358(6) Å, F1...H12<sup>iii</sup>-C12<sup>iii</sup> 165°, F2...H7b 2.48, F2...C7 3.37(1) Å, F2...H7b-C7 150°, F4...H7b 2.38, F4...C7 3.274(8) Å, F4...H7b-C7 160°. Symmetry code:  $iii = 1 + x, y, -1 + z$ .

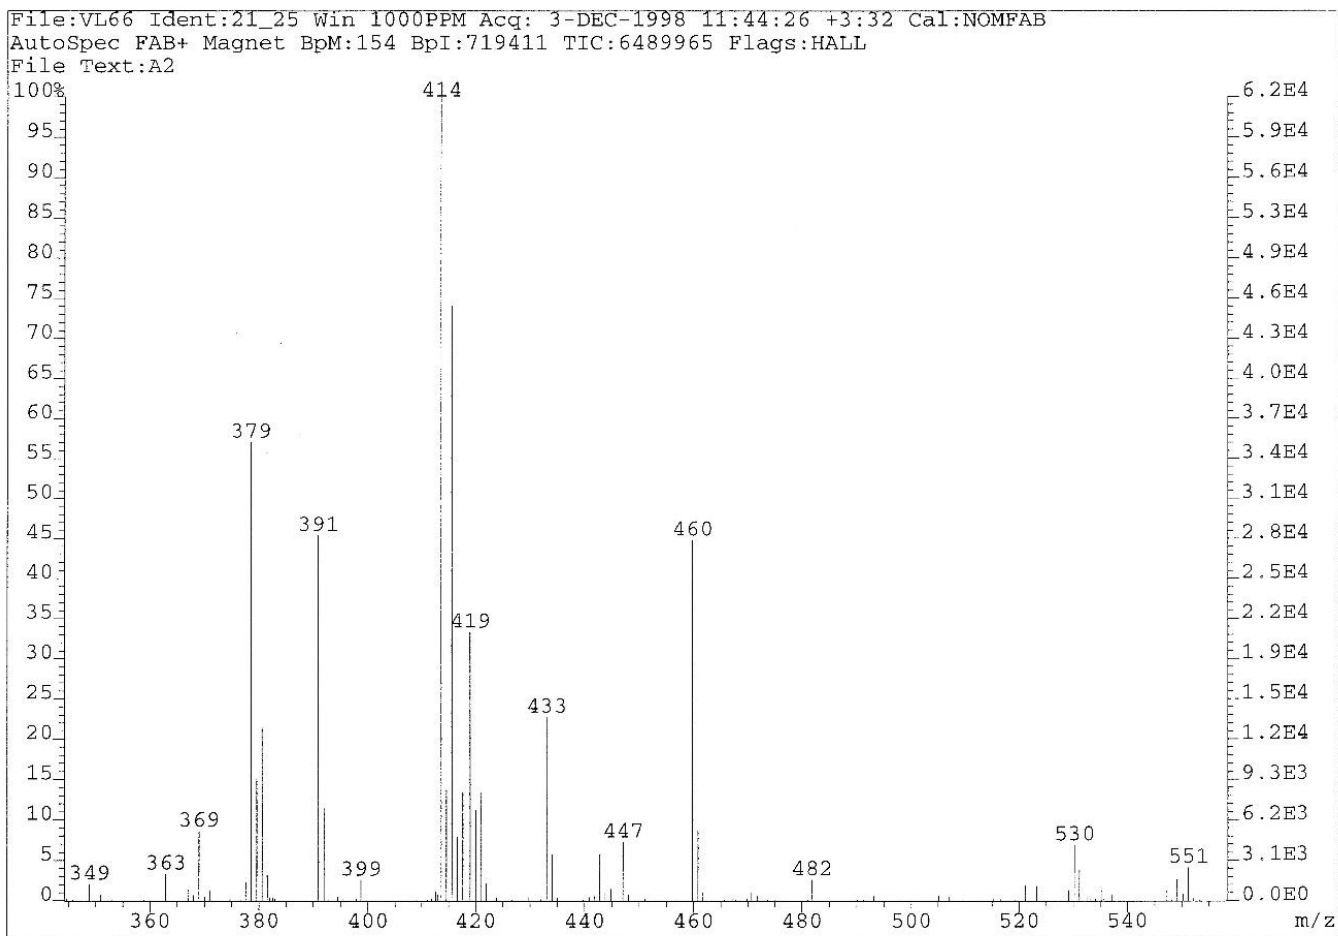

Figure S13. FAB Mass Spectrum of  $[\text{Rh}(\text{L}^1)\text{Cl}_2](\text{PF}_6)$ .

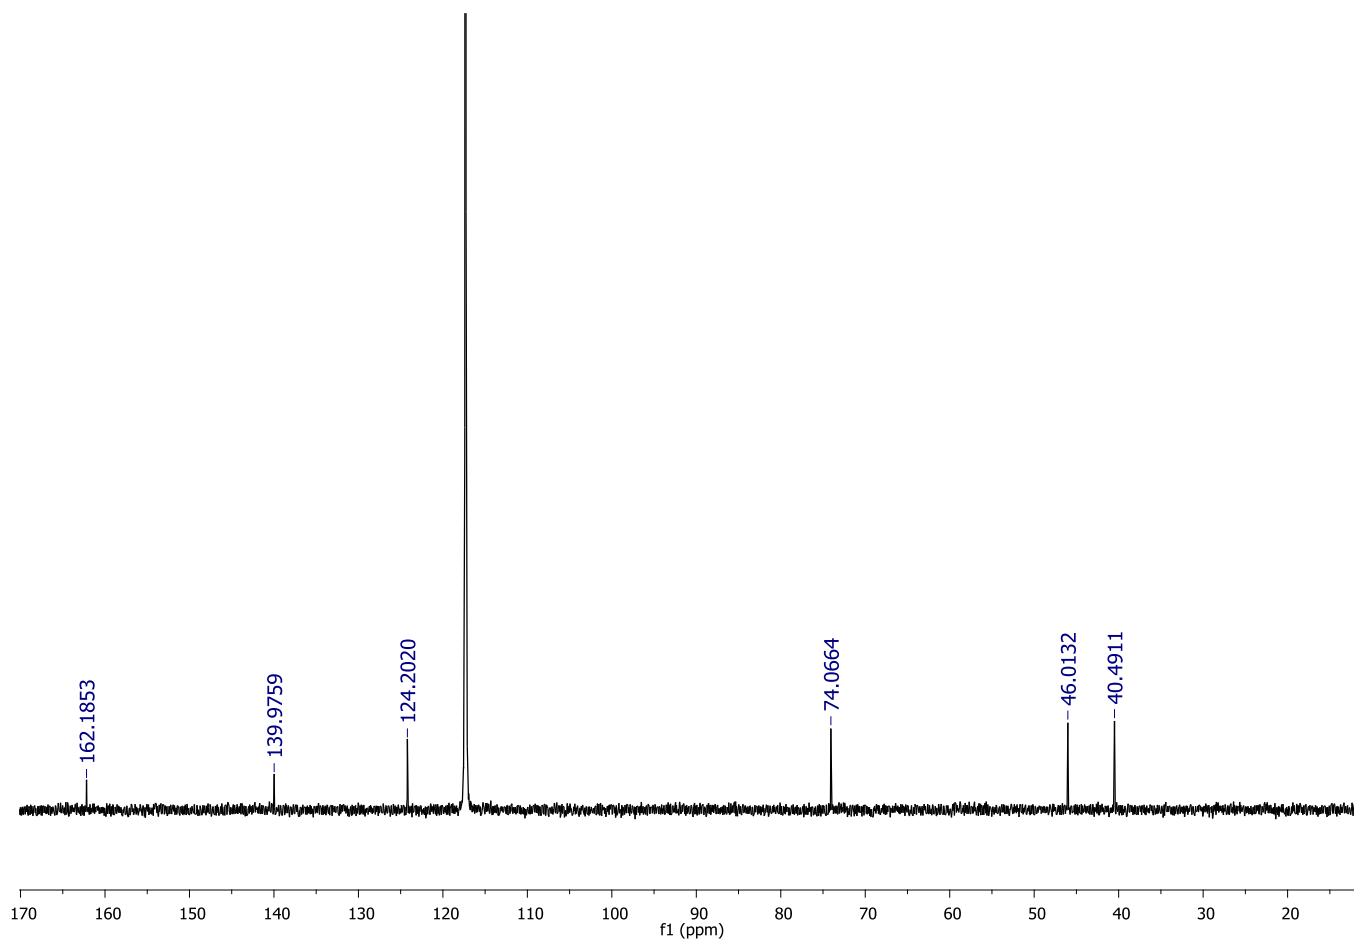

**Figure S14.**  $^{13}\text{C}$ -NMR of  $[\text{Rh}(\text{L}^1)\text{Cl}_2](\text{PF}_6)$  recorded in  $\text{CD}_3\text{CN}$  (150.9 MHz).

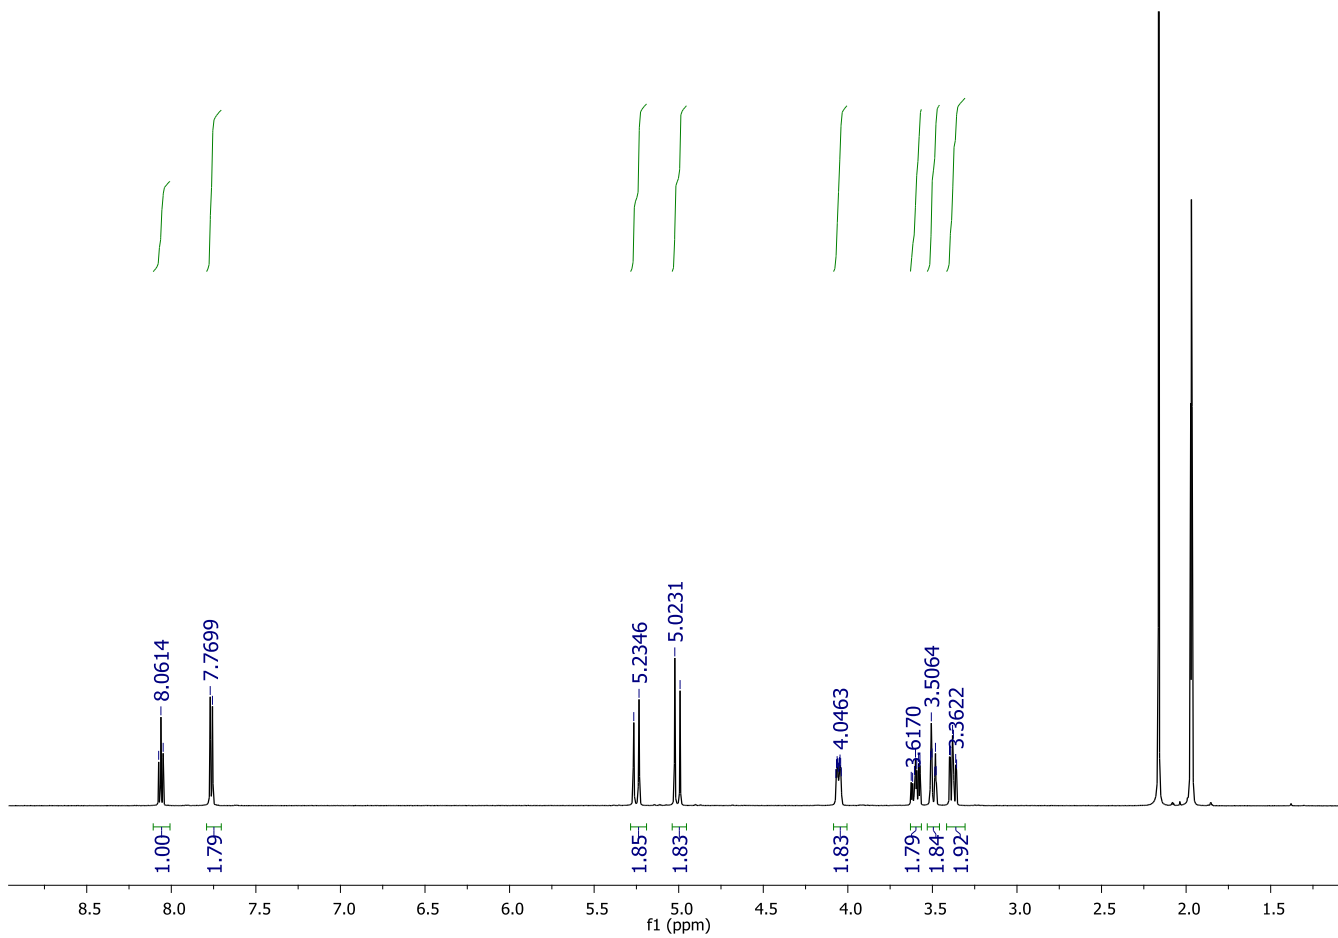

**Figure S15.** <sup>1</sup>H-NMR of [Rh(L<sup>1</sup>)Cl<sub>2</sub>](PF<sub>6</sub>) recorded in CD<sub>3</sub>CN (600 MHz).

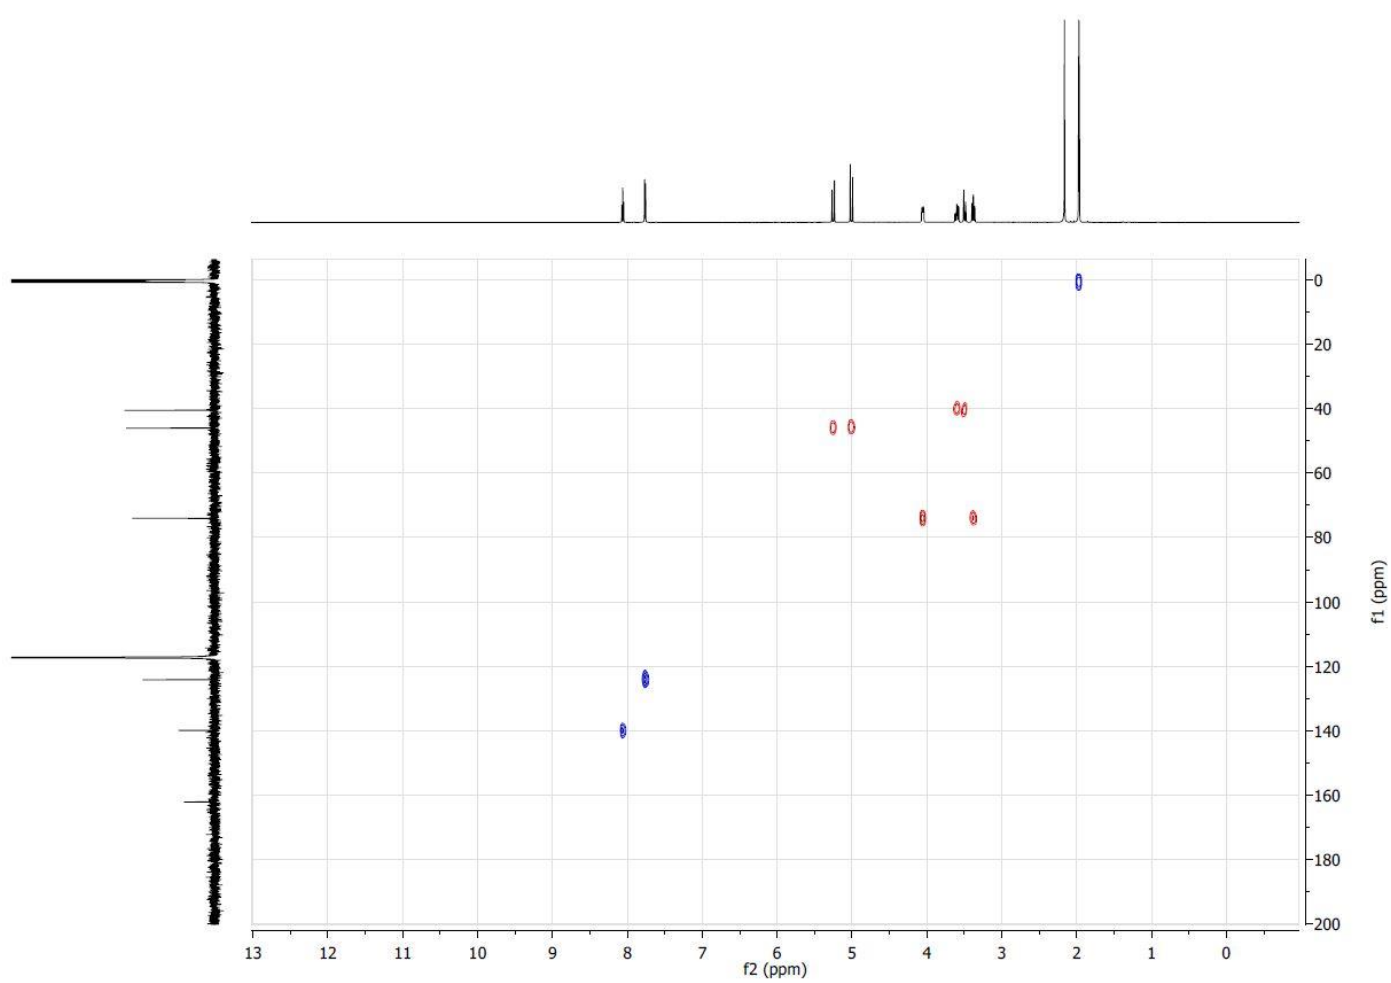

**Figure S16.**  $^1\text{H}$ - $^{13}\text{C}$  HSQC spectrum of  $[\text{Rh}(\text{L}^1)\text{Cl}_2](\text{PF}_6)$  recorded in  $\text{CD}_3\text{CN}$  on a Bruker Avance III HD 600 MHz spectrometer.



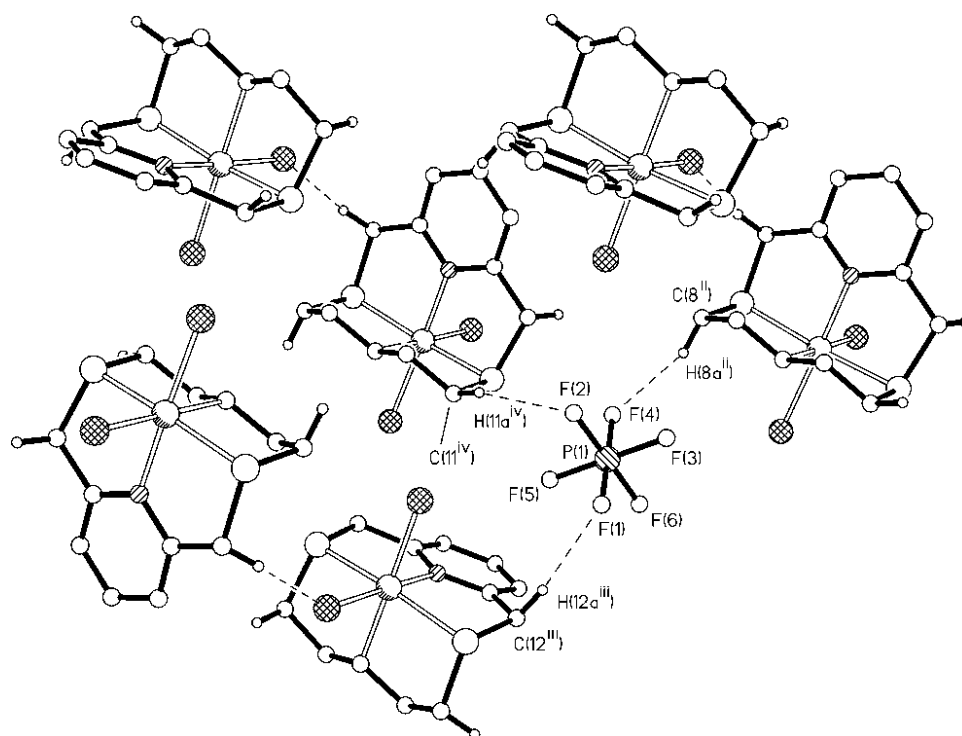

**Figure S17.** Partial view of the packing along the [0-11] direction for the compound [Rh(L<sup>1</sup>)Cl<sub>2</sub>](PF<sub>6</sub>). Only H atoms involved in the relevant H-bonds are shown for clarity. F1...H12a<sup>iii</sup> 2.49 Å, F1...C12<sup>iii</sup> 3.450(8) Å, F1...H12a<sup>iii</sup>-C12<sup>iii</sup> 169°, F2...H11a<sup>iv</sup> 2.53 Å, F2...C11<sup>iv</sup> 3.427(9) Å, F2...H11a<sup>iv</sup>-C11<sup>iv</sup> 154°, F4...H8a<sup>ii</sup> 2.33 Å, F4...C8<sup>ii</sup> 3.209(9) Å, F4...H8a<sup>ii</sup>-C8<sup>ii</sup> 150°. Symmetry codes: ii = -x, 1-y, 1-z; iii = 1-x, 1/2 + y, 3/2 -z; iv = 1-x, 1-y, 1-z.

File:VL70 Ident:46\_63 Win 1000PPM Acq: 8-DEC-1998 11:52:16 +8:11 Cal:NOMFAB  
AutoSpec FAB+ Magnet BpM:154 BpI:374606 TIC:3660061 Flags:HALL  
File Text:A6

A6

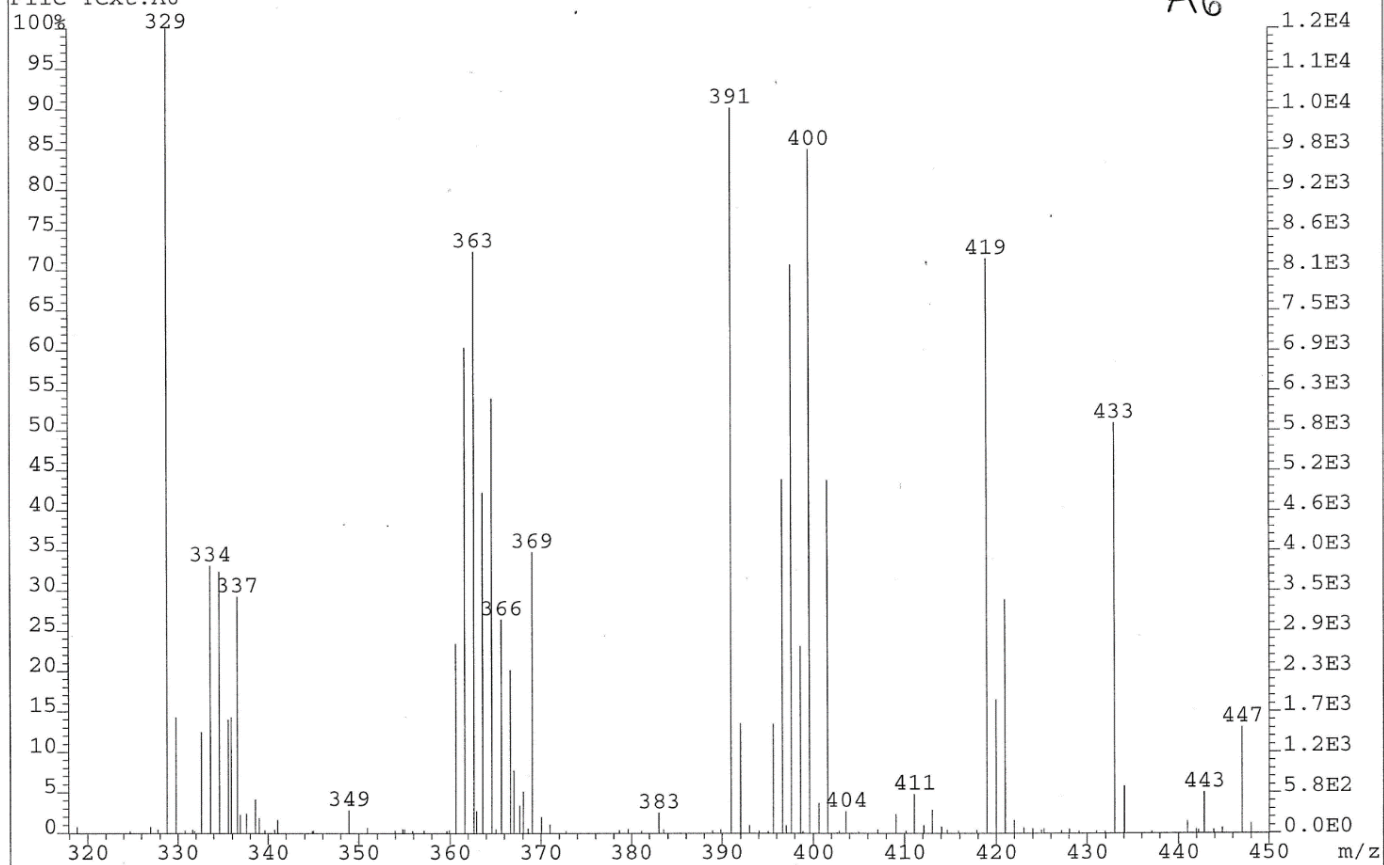

Figure S18. FAB Mass Spectrum of  $[\text{Pd}(\text{L}^2)\text{Cl}]\text{Cl}$ .

File:VL69 Ident:11\_16 Win 1000PPM Acq: 8-DEC-1998 11:32:17 +2:08 Cal:NOMFAB  
AutoSpec FAB+ Magnet BpM:154 BpI:445888 TIC:4178458 Flags:HALL  
File Text:A5

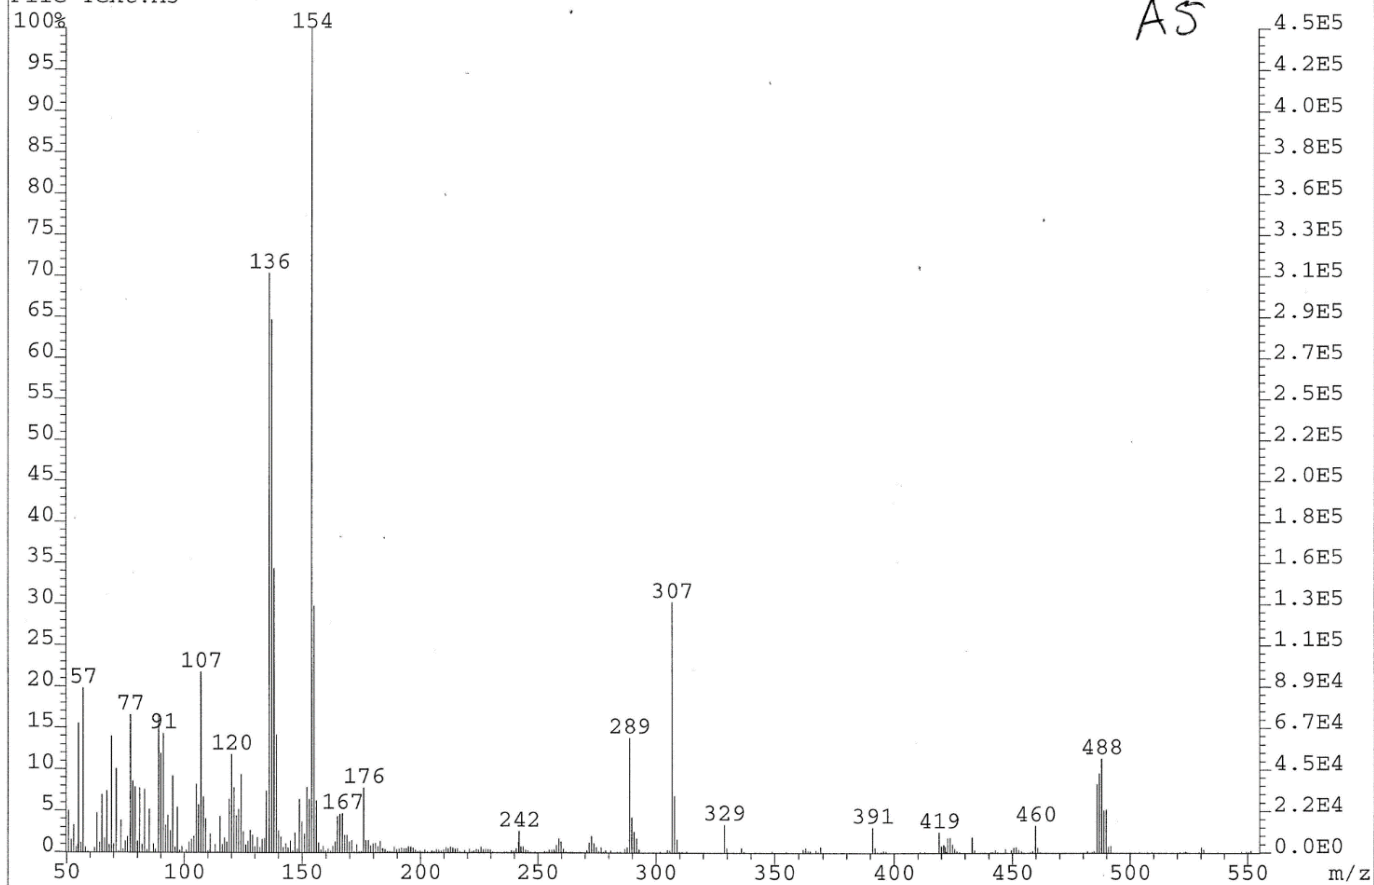

Figure S19. FAB Mass Spectrum of  $[\text{Pt}(\text{L}^2)\text{Cl}]\text{Cl}$ .

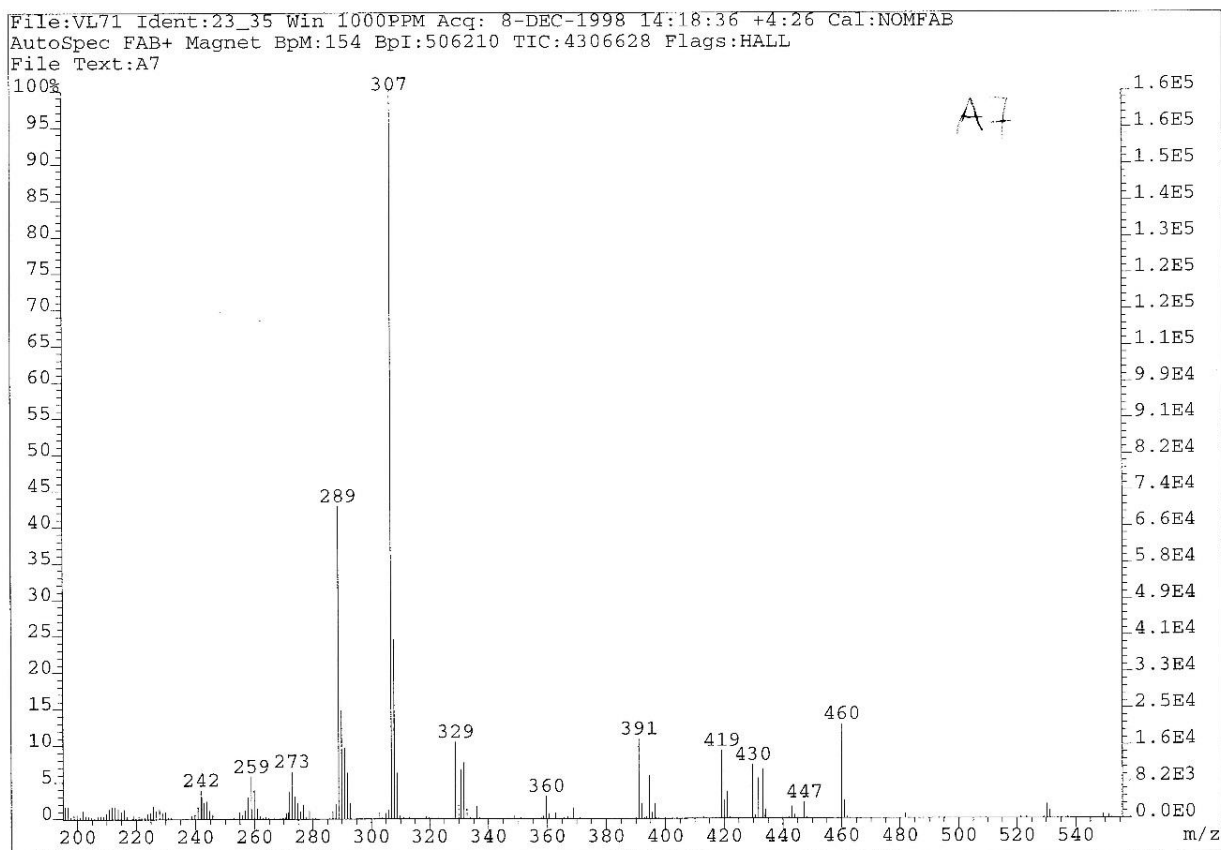

**Figure S20.** FAB Mass Spectrum of  $[\text{Rh}(\text{L}^2)\text{Cl}_2](\text{PF}_6)$ .

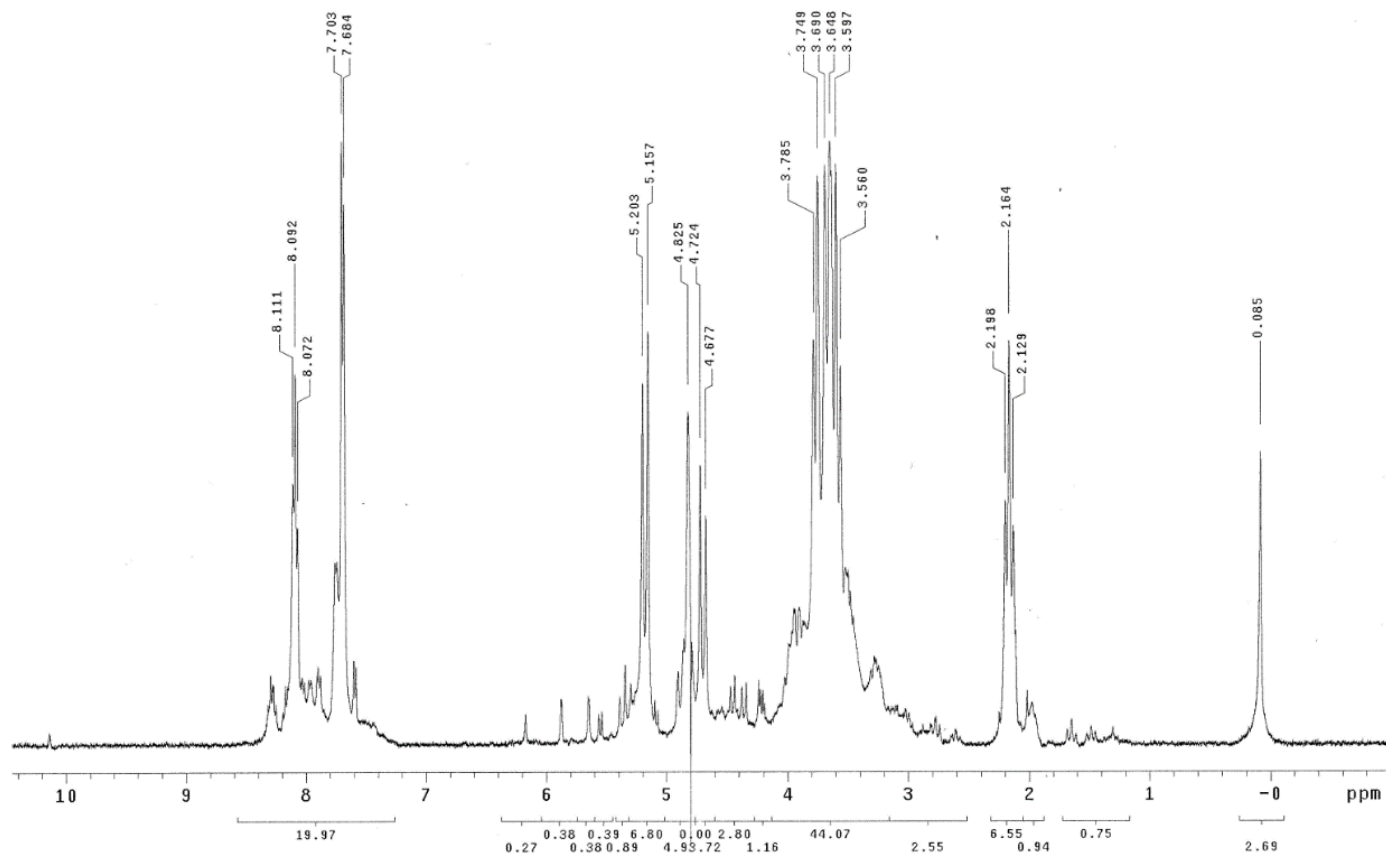

Figure S21. <sup>1</sup>H-NMR spectrum of [Pd(L<sup>2</sup>)Cl]Cl recorded in D<sub>2</sub>O (400 MHz).

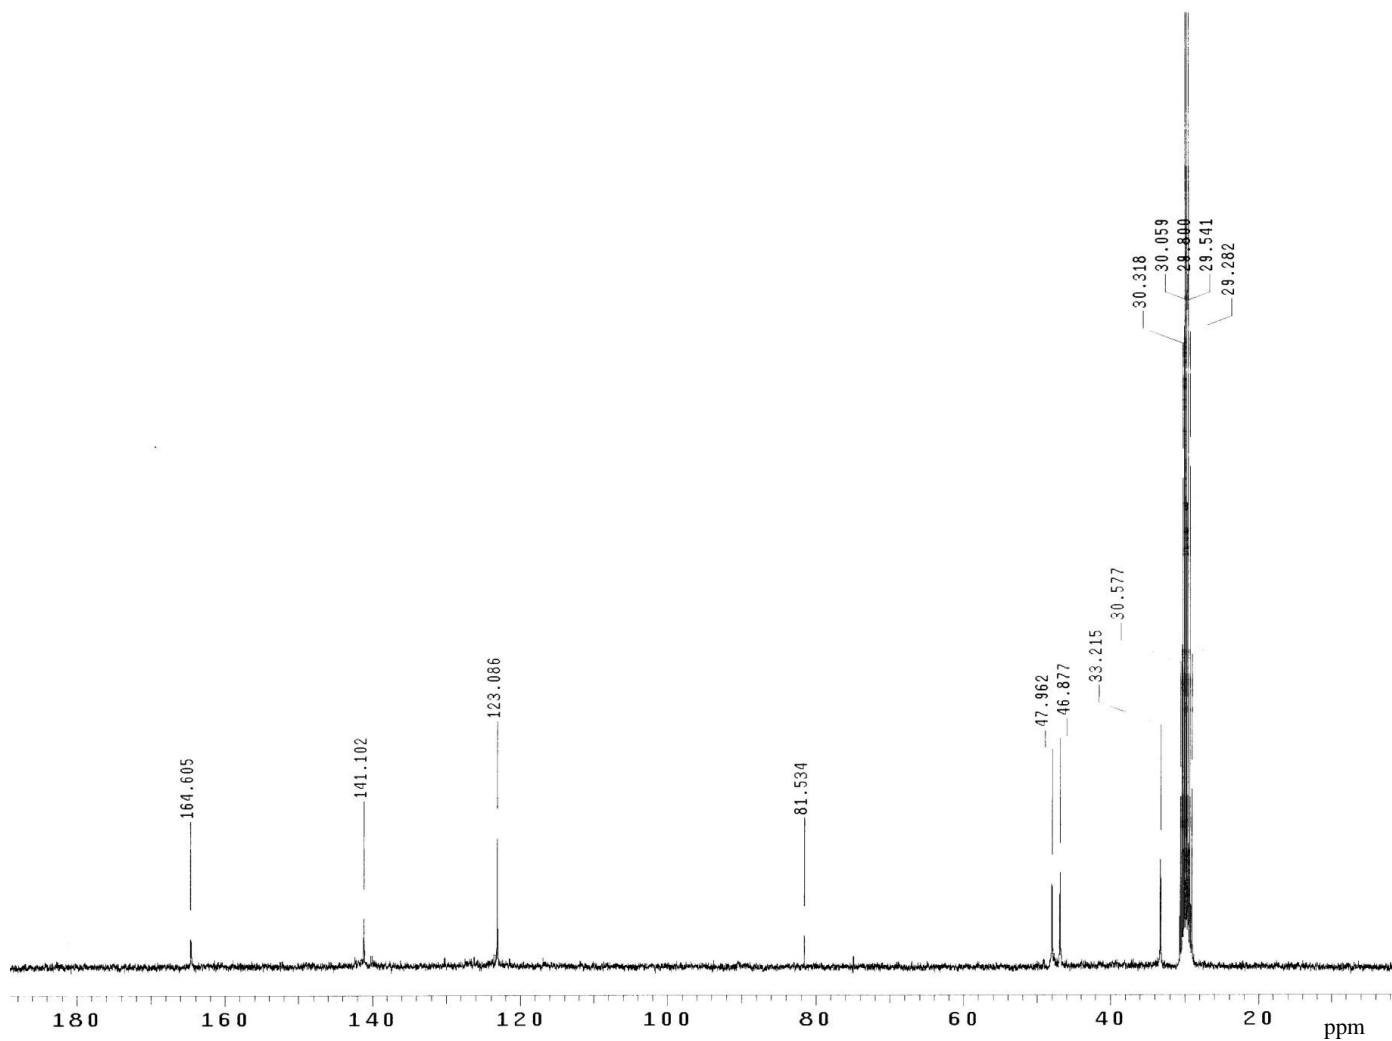

**Figure S22.**  $^{13}\text{C}$ -NMR spectrum of  $[\text{Pd}(\text{L}^2)\text{Cl}]\text{Cl}$  recorded in  $\text{d}_6$ -acetone (100.62 MHz).

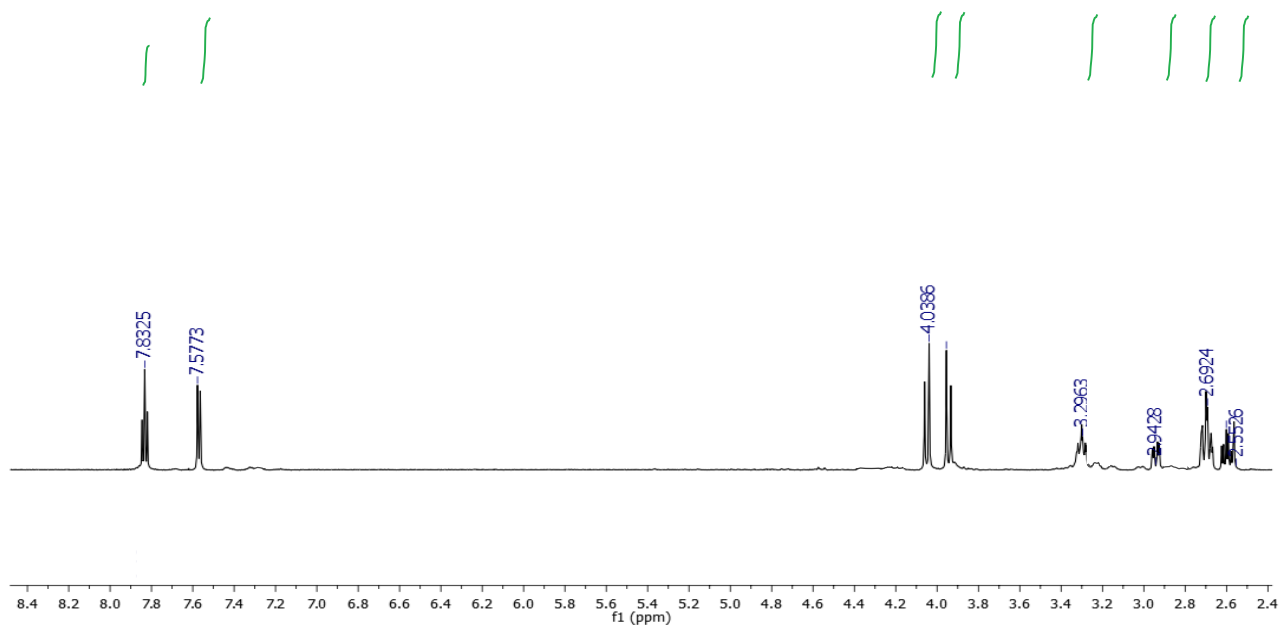

**Figure S23.**  $^1\text{H-NMR}$  spectrum of  $[\text{Pt}(\text{L}^2)\text{Cl}]\text{Cl}$  recorded in  $\text{CD}_3\text{CN}$  (600 MHz).

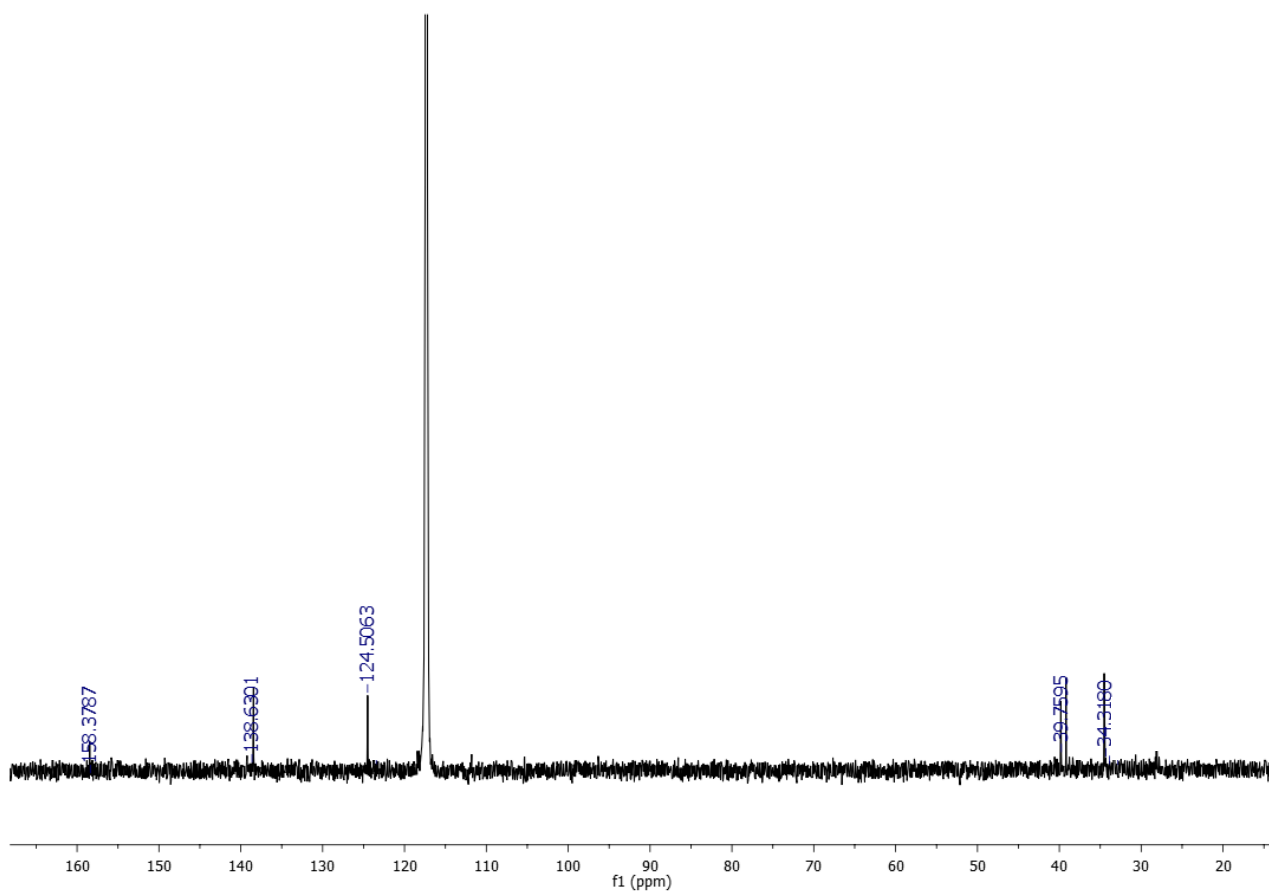

**Figure S24.** <sup>13</sup>C-NMR spectrum of [Pt(L<sup>2</sup>)Cl]Cl recorded in CD<sub>3</sub>CN (150.9 MHz).



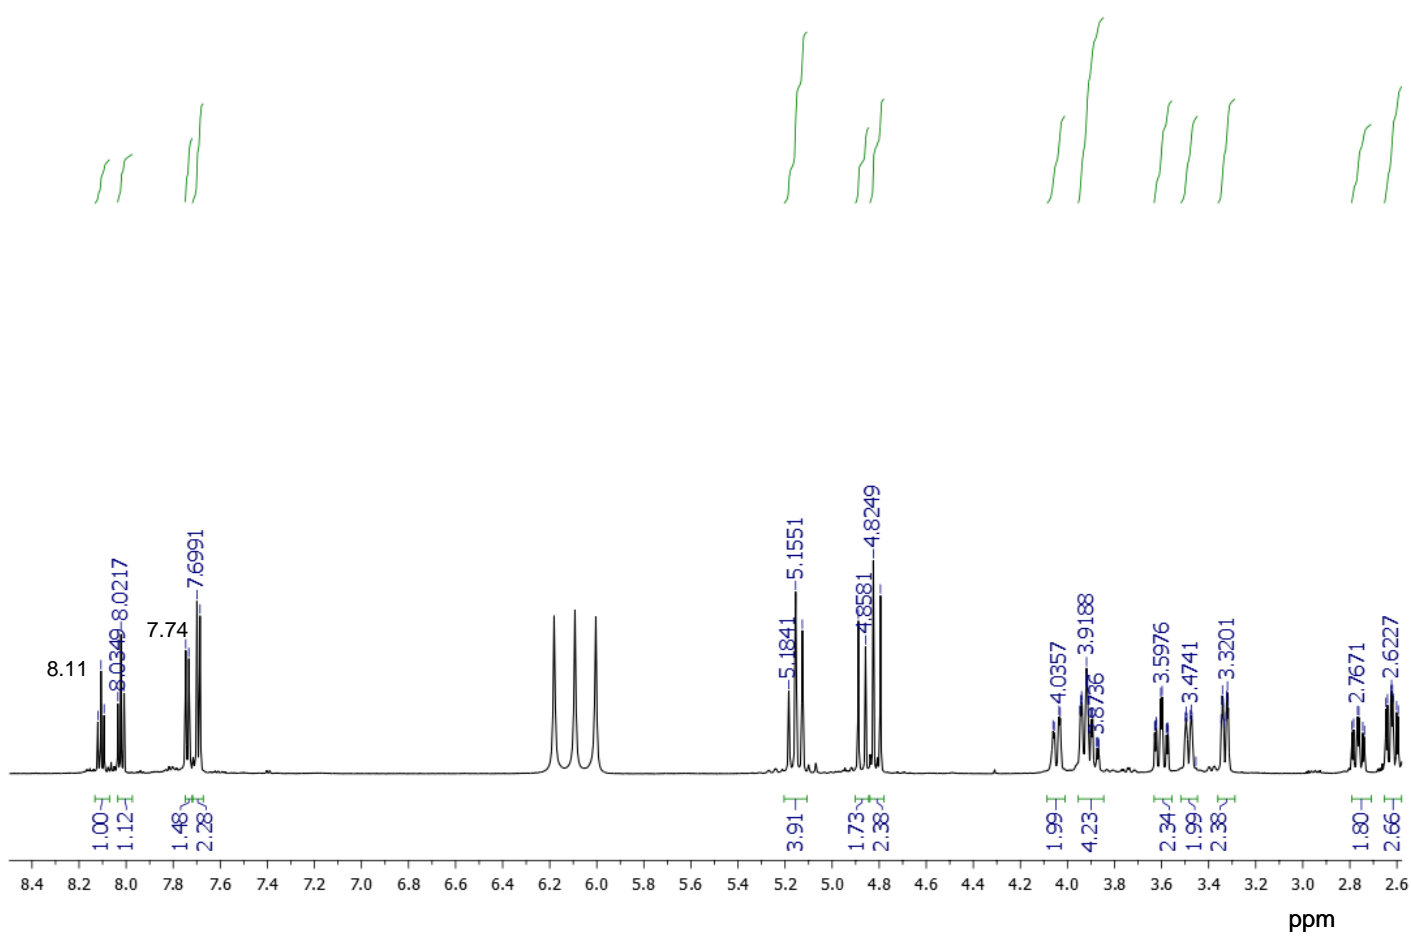

**Figure S25.** <sup>1</sup>H-NMR of [Rh(L<sup>2</sup>)Cl<sub>2</sub>](PF<sub>6</sub>) recorded in CD<sub>3</sub>CN (600 MHz).

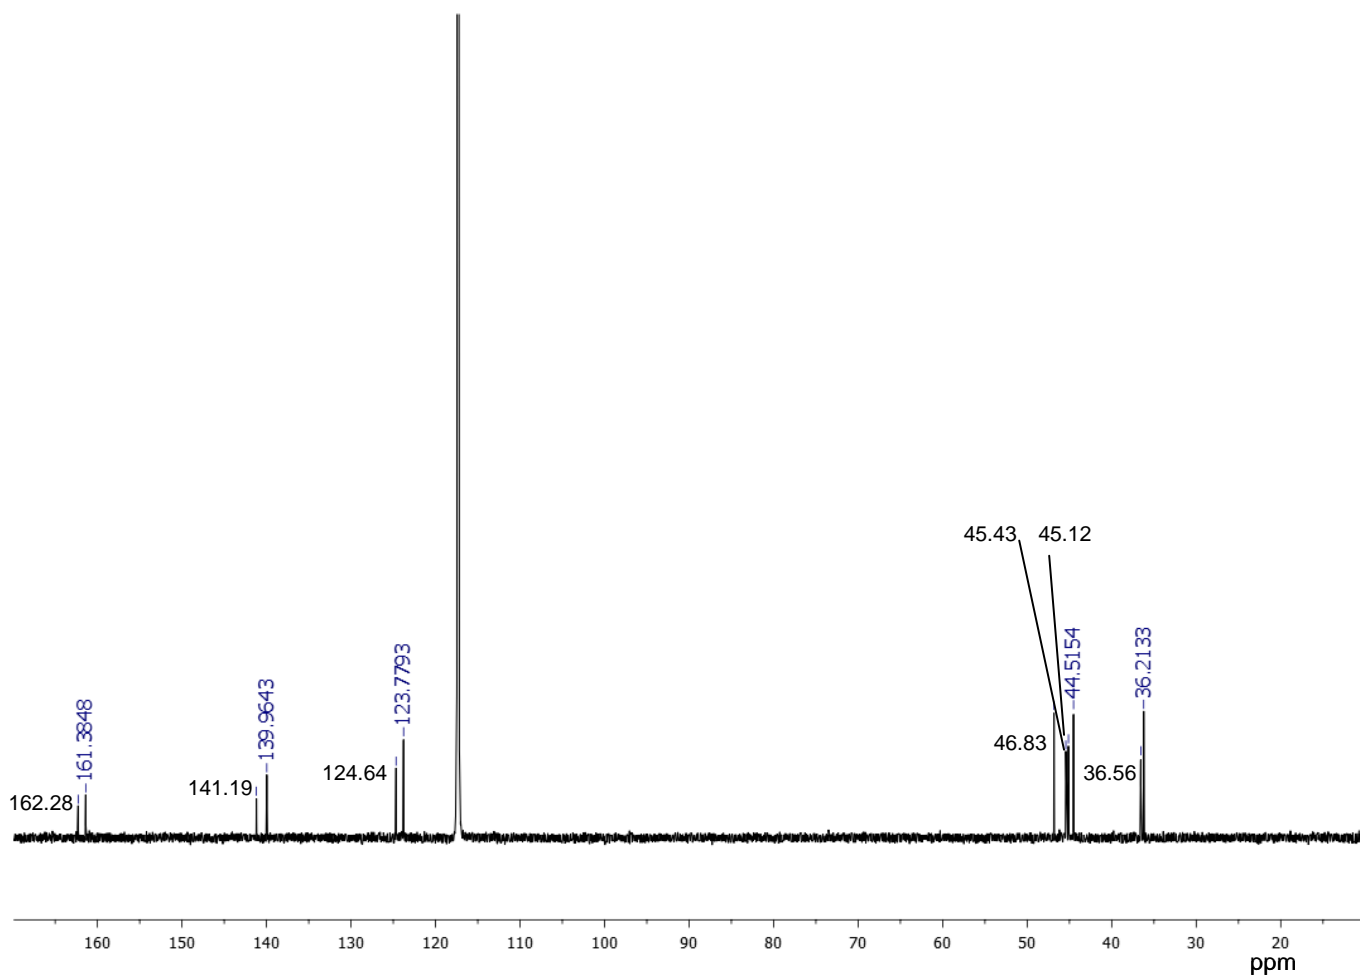

**Figure S26.**  $^{13}\text{C}$ -NMR of  $[\text{Rh}(\text{L}^2)\text{Cl}_2](\text{PF}_6)$  recorded in  $\text{CD}_3\text{CN}$  (150.9 MHz).

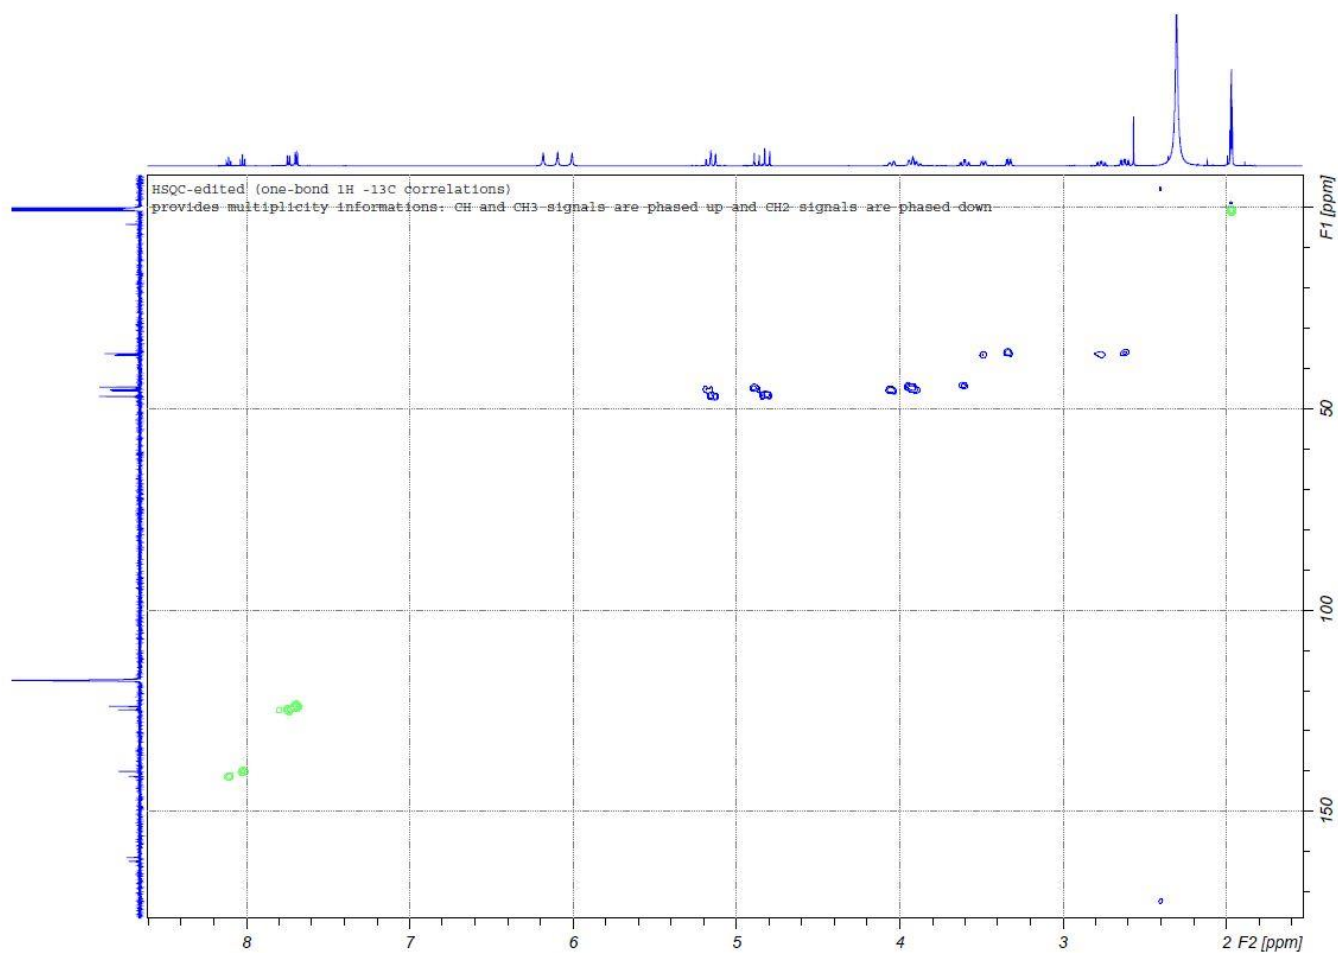

**Figure S27.**  $^1\text{H}$ - $^{13}\text{C}$  HSQC spectrum of  $[\text{Rh}(\text{L}^2)\text{Cl}_2](\text{PF}_6)$  recorded in  $\text{CD}_3\text{CN}$  on a Bruker Avance III HD 600 MHz spectrometer.

### Solution structures of the of L<sup>1</sup> and L<sup>2</sup> complexes with Rh<sup>III</sup>.

First, we analyzed the NOESY spectrum (200 ms mixing time) acquired on the L<sup>1</sup> complex. A clear dipolar interaction was found between both the methylene protons on C7/C12 and the aromatic protons on C5/C3. However, the intensity of the two cross-peaks was remarkably different. The intensity ratio between the cross-peak at [7.74-4.98] ppm and the one at [7.74-5.22] ppm was as large as 5.7. This means that the two geminal protons and the aromatic proton are significantly different. Cross-peak intensity is directly proportional to the inverse sixth-power of the interproton distance, so that from intensity ratio we can estimate a distance ratio of 1.34.

Among the two geminal protons, only the one resonating at 4.98 ppm showed a significant correlation with protons belonging to other methylene groups in the macrocycle, namely at 3.47 and 3.35 ppm. The latter are bound to two different carbon atoms, so that we can conclude that the six protons resonating at 4.98, 3.47 and 3.35 ppm are located on the same side of the macrocycle plane and are located at closer distance with each other as compared to the other six methylene protons. The intensity ratio between the cross-peaks at [4.98-3.47] ppm and [4.98-3.35] ppm is 2.4, corresponding to a distance ratio of 1.16. All of these observations are incompatible with a *trans* configuration. Figure S28 shows the only molecular model compatible with our results, which is in agreement with the crystal structure shown in Figure 5.

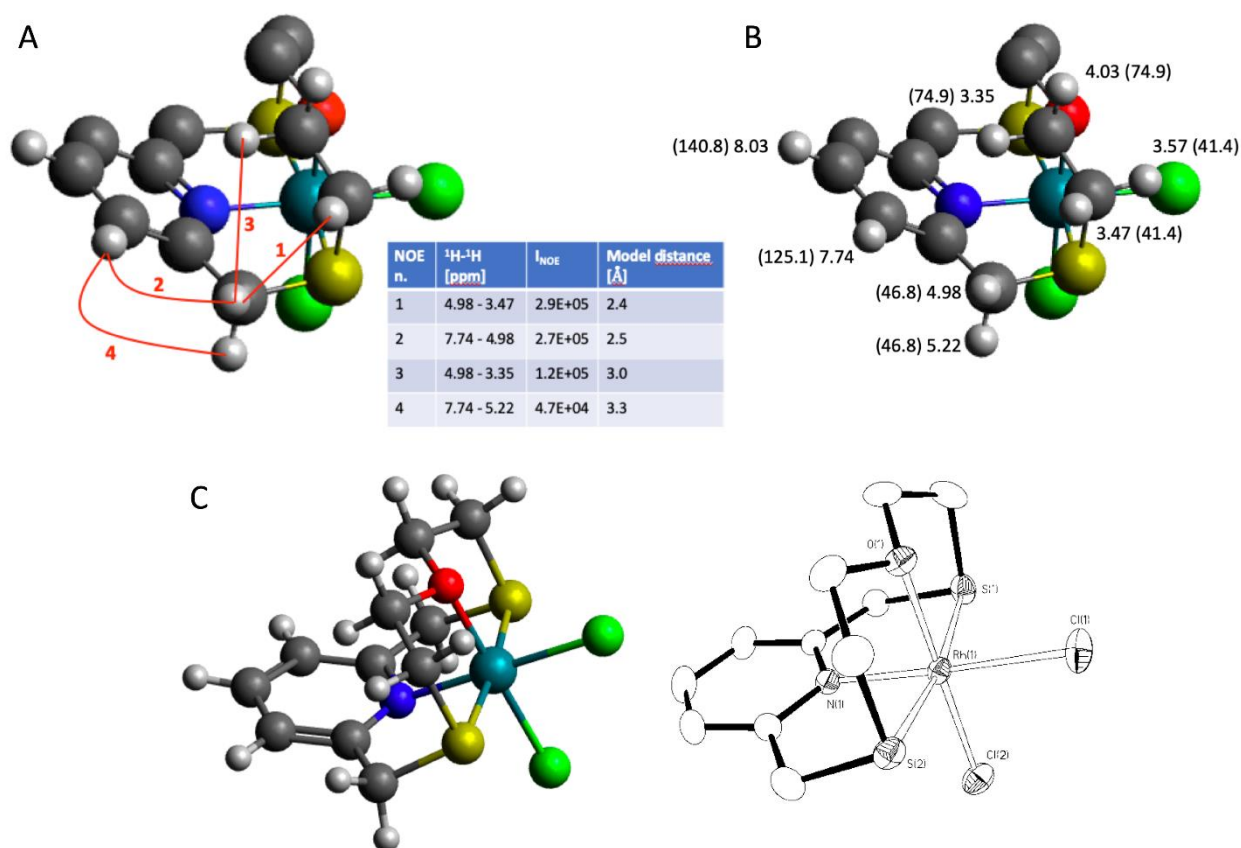

**Figure S28.** (A) Model of the dichlorido complex cation [Rh(L<sup>2</sup>)Cl<sub>2</sub>]<sup>+</sup> is shown. Only the hydrogen atoms pointing at the observer are reported for clarity. The identified NOEs are reported as red lines and are numbered in decreasing intensity order. The table beside the figure shows the strong inverse correlation between the NOE intensity and the corresponding interproton distance in the model. (B) Complete resonance assignments are shown. <sup>1</sup>H chemical shift [ppm] is reported beside the protons together with the corresponding <sup>13</sup>C chemical shift in parenthesis. (C) Another perspective of the solution structure is proposed, showing a perfect agreement with the crystal structure of the complex cation [Rh(L<sup>2</sup>)Cl<sub>2</sub>]<sup>+</sup> (see figure 5).

When <sup>1</sup>H-NMR spectrum of the L<sup>2</sup> complexes is compared to that of the L<sup>1</sup> complex, it is clear that all the complexes share the same fine structure for all the resonances. In addition, the NOEs pattern resulted to be very similar for the two L<sup>2</sup> complexes present in solution and both of them were similar to the complex formed

by  $L^1$ . Slight differences were found in the intensity ratio and, as a consequence, in the ratio between interproton distances. In particular, distance ratio between the two protons on the C7/C12 and the one on C3/C5 was 1.34, 1.25 and 1.21 for  $L^1$ , the major  $L^2$  and the minor  $L^2$  complex, respectively. Conversely, distance ratio between one proton on the C7/C12 and one proton on each of the C8/C11 and C9/C10 was 1.28, 1.22 and 1.16 for the minor  $L^2$ , the major  $L^2$  and the  $L^1$  complex, respectively. Overall, the present results indicate that the *trans* configuration can be ruled out. The two complexes formed by  $L^2$  are very similar to the one formed by  $L^1$ , with the latter being the more "compact", followed by the more abundant  $L^2$  complex and finally by the less abundant one, which are more "open" but still in a "book" conformation.

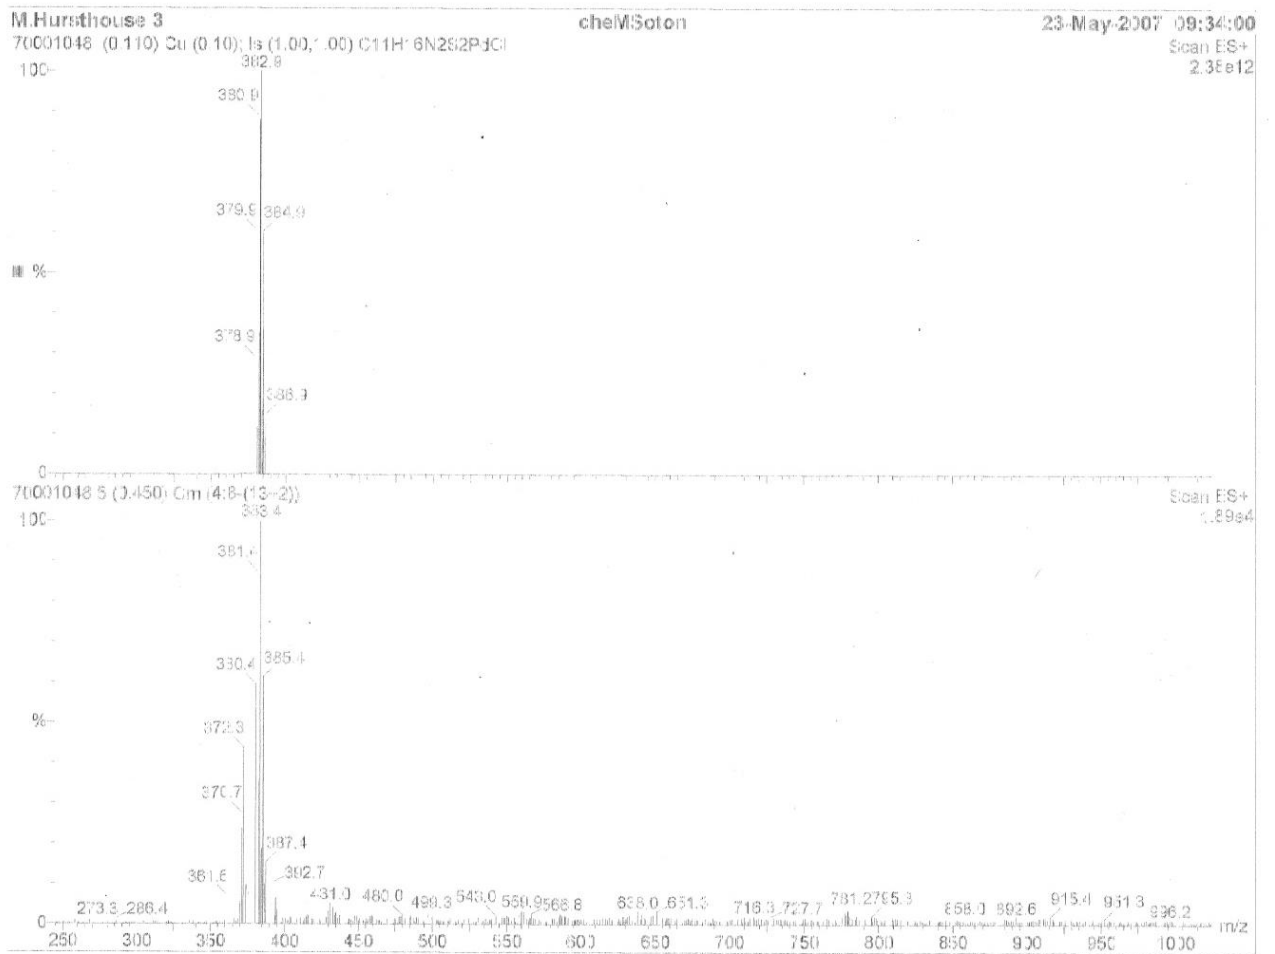

Figure S29. FAB Mass Spectrum of [Pd(L<sup>3</sup>)Cl](PF<sub>6</sub>).

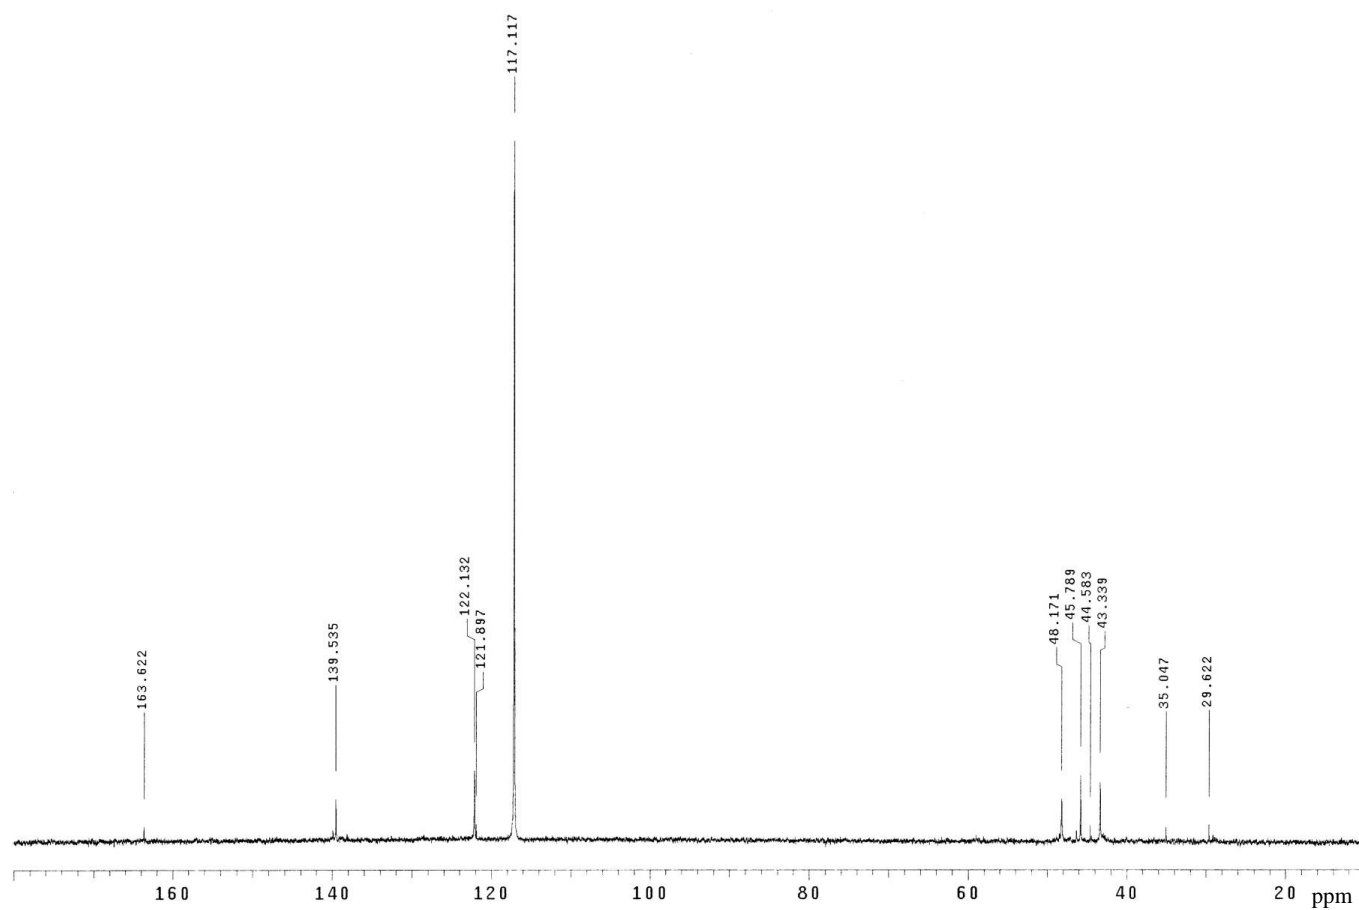

**Figure S30.**  $^{13}\text{C}$ -NMR spectrum of  $[\text{Pd}(\text{L}^3)\text{Cl}](\text{PF}_6)$  recorded in  $\text{CD}_3\text{CN}$  (100.62 MHz).

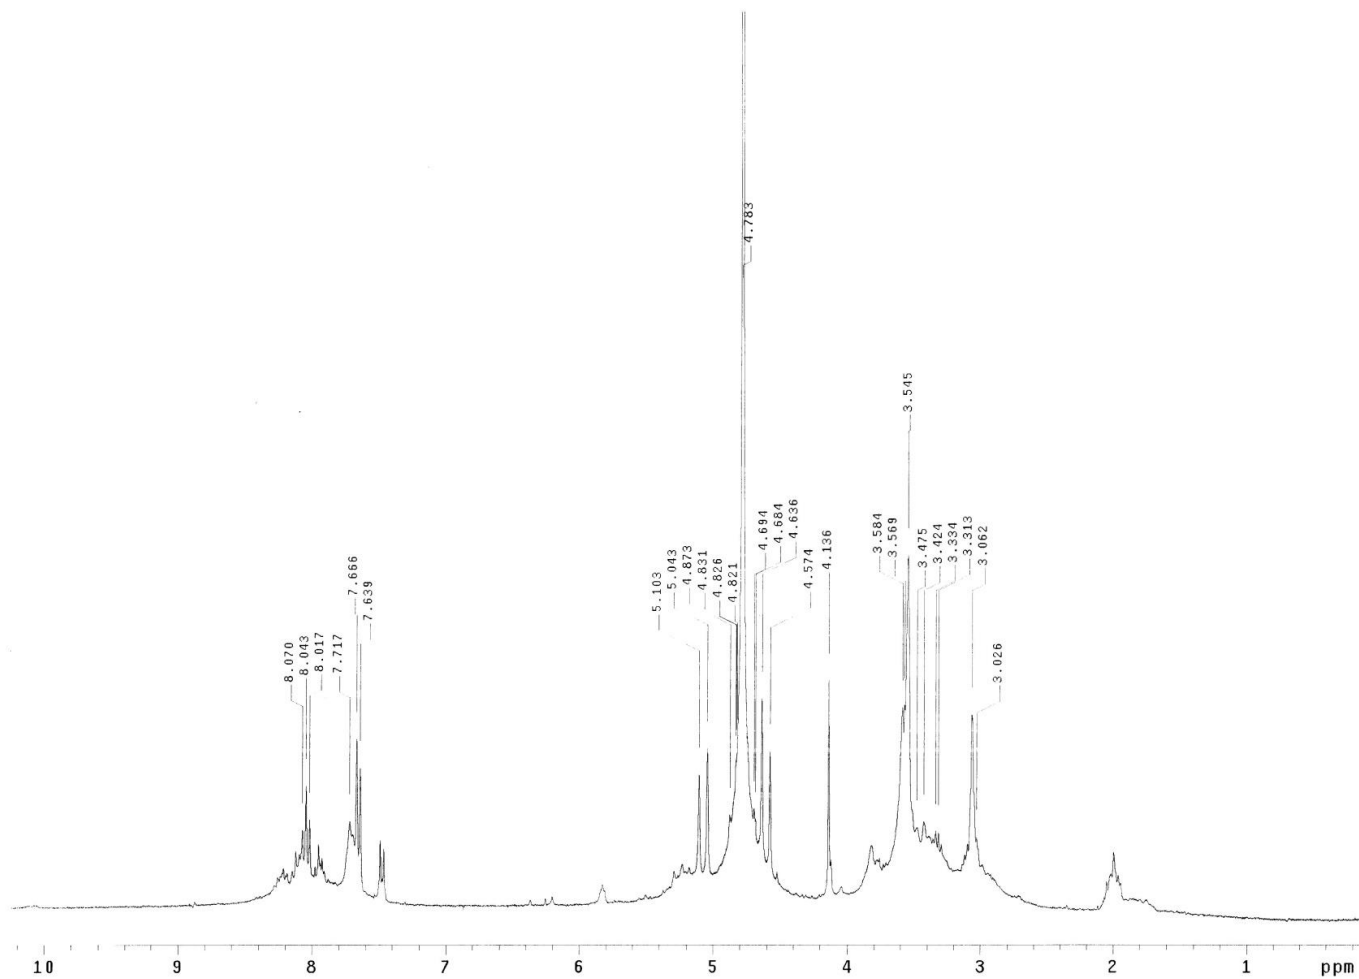

**Figure S31.**  $^1\text{H-NMR}$  spectrum of  $[\text{Pd}(\text{L}^3)\text{Cl}](\text{PF}_6)$  recorded in  $\text{D}_2\text{O}$  (400 MHz).



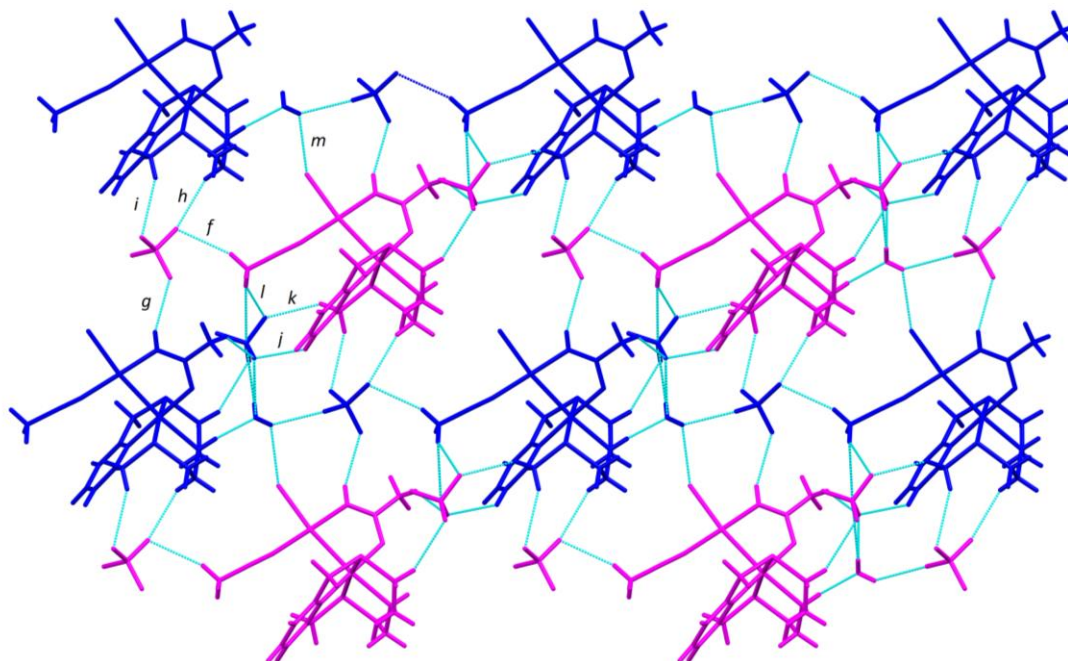

**Figure S32.** Packing view of symmetry-related interacting chains of complex cations,  $\text{BF}_4^-$  anions and  $\text{H}_2\text{O}$  molecules in  $[\text{Pt}(\text{L}^3)(\mu\text{-}1,3\text{-MeCONH})\text{PtCl}(\text{MeCN})](\text{BF}_4)_2 \cdot \text{H}_2\text{O}$  along the  $[010]$  direction. H-atoms not involved in H-interactions were omitted for clarity. Interactions shown (D–H $\cdots$ A: D–H Å, H $\cdots$ A Å, D $\cdots$ A Å, D–H $\cdots$ A $^\circ$ ): *f*, C16–H16B $\cdots$ F4<sup>i</sup> 0.96(5), 2.59(5), 3.52(7), 161(5); *g*, N4–HN4 $\cdots$ F6<sup>ii</sup> 0.79(5), 2.44(5), 3.156(5), 151(5); *h*, C9–H9B $\cdots$ F4<sup>iii</sup> 0.97, 2.48, 3.362(5), 151; *i*, C7–H7A $\cdots$ F3<sup>iv</sup> 0.97, 2.51, 3.130(5), 122; *j*, C5–H5 $\cdots$ F8<sup>iii</sup> 0.93, 2.38, 3.122(6), 137; *k*, C7–H7B $\cdots$ F9<sup>iii</sup> 0.97, 2.47, 3.284(6), 141; *l*, C16–H16C $\cdots$ F9<sup>iii</sup> 0.96, 2.40, 3.279(7), 153; *m*, OW–HW1 $\cdots$ Cl1<sup>v</sup> 0.86(7) Å, 2.77(8) Å, 3.356(6) Å, 127(6) $^\circ$ . Symmetry codes: *i* =  $x, y, -1+z$ ; *ii* =  $-1/2+x, 1/2-y, -1/2+z$ ; *iii* =  $1/2+x, 1/2-y, -1/2+z$ ; *iv* =  $-3/2-x, -1/2+y, 5/2-z$ ; *v* =  $1/2+x, 1/2-y, 1/2+z$ .

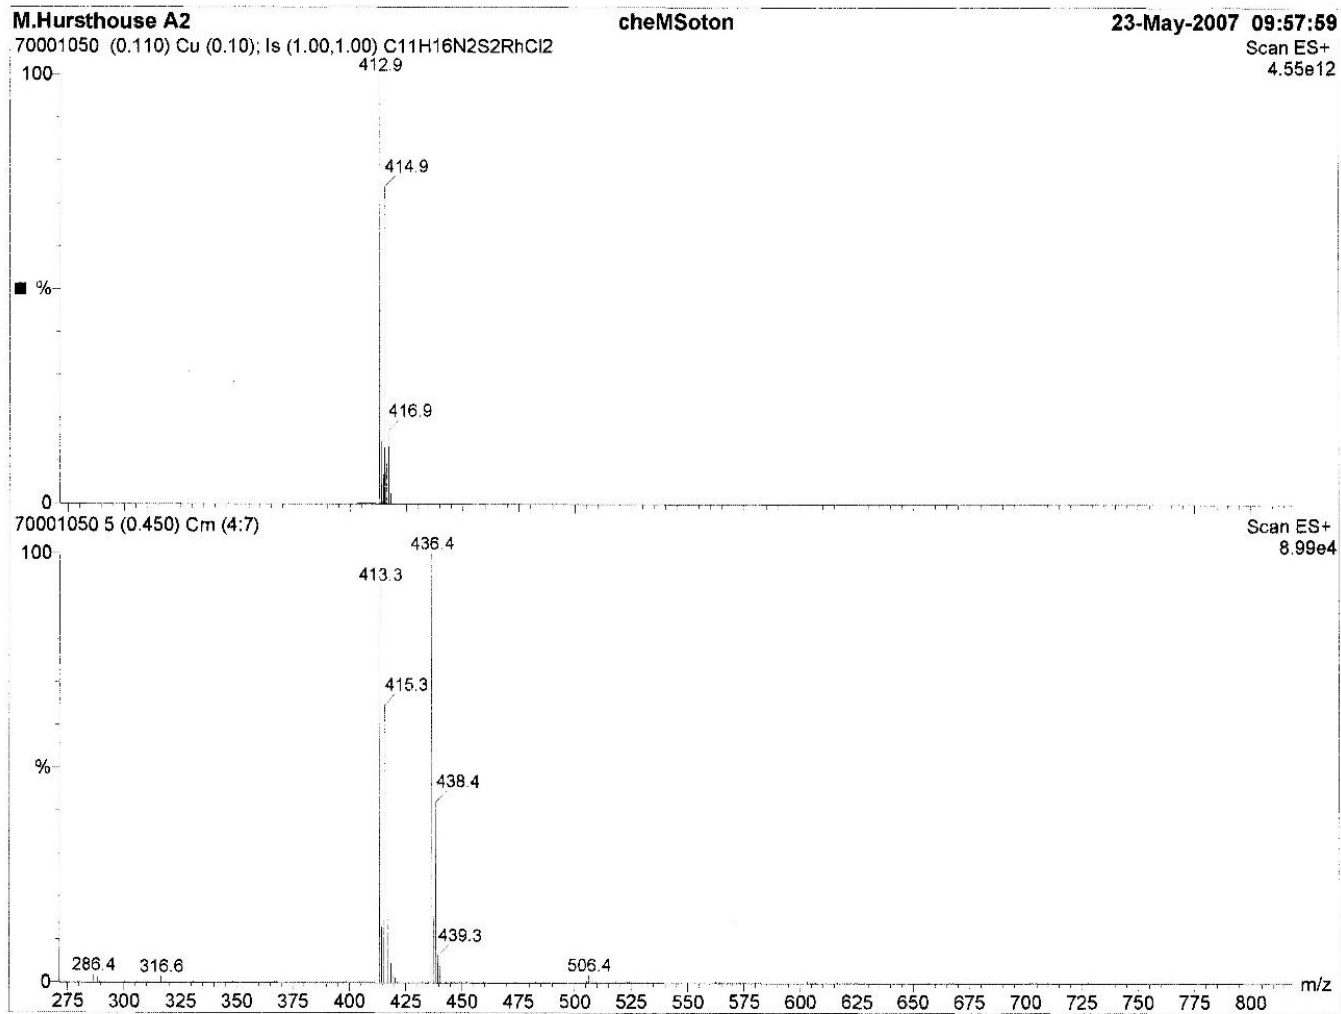

Figure S33. FAB Mass Spectrum of  $[\text{Rh}(\text{L}^3)\text{Cl}_2](\text{BF}_4)\cdot\text{MeCN}$ .

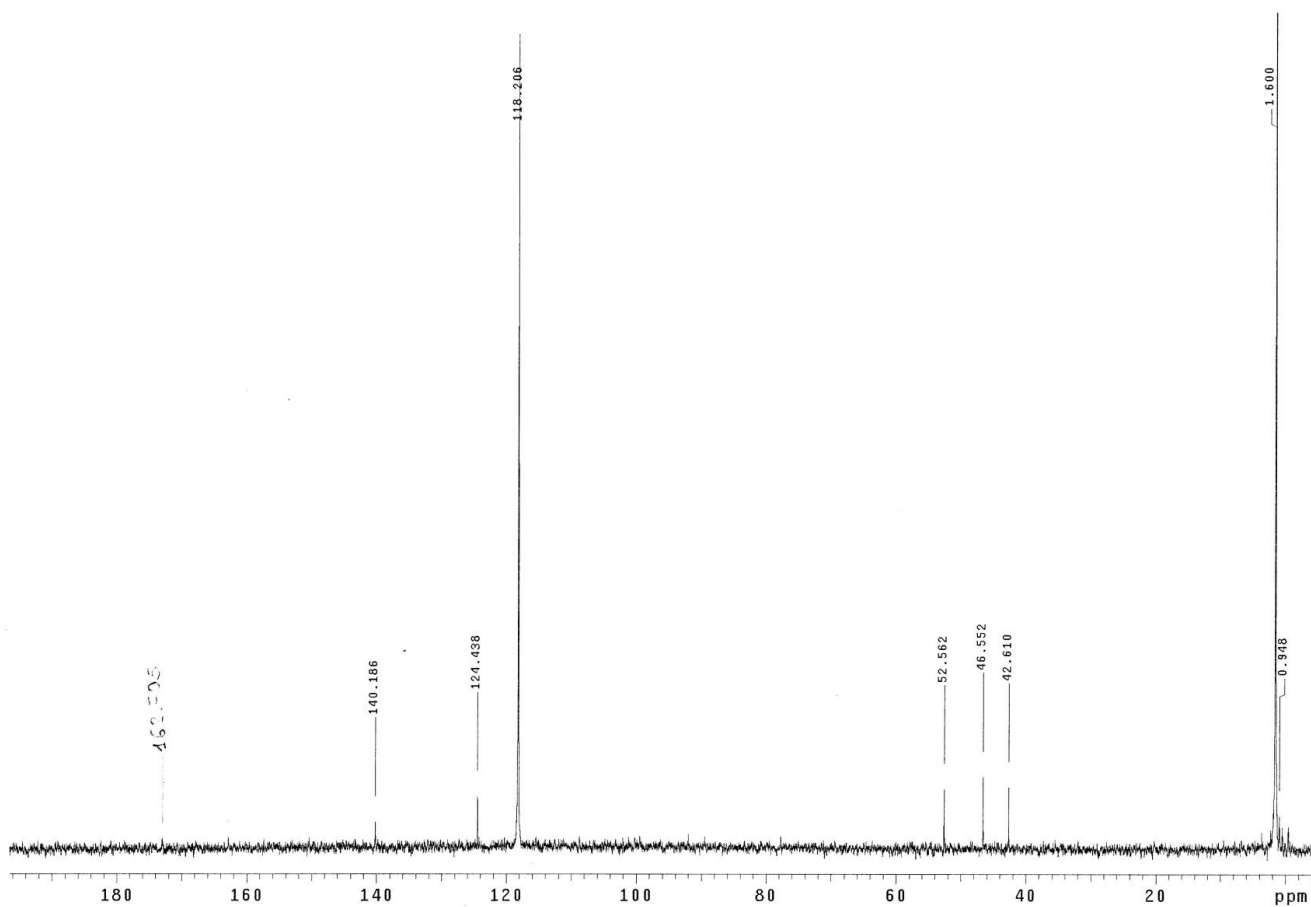

**Figure S34.**  $^{13}\text{C}$ -NMR spectrum of  $[\text{Rh}(\text{L}^3)\text{Cl}_2](\text{BF}_4)\cdot\text{MeCN}$  recorded in  $\text{CD}_3\text{CN}$  (100.62 MHz).

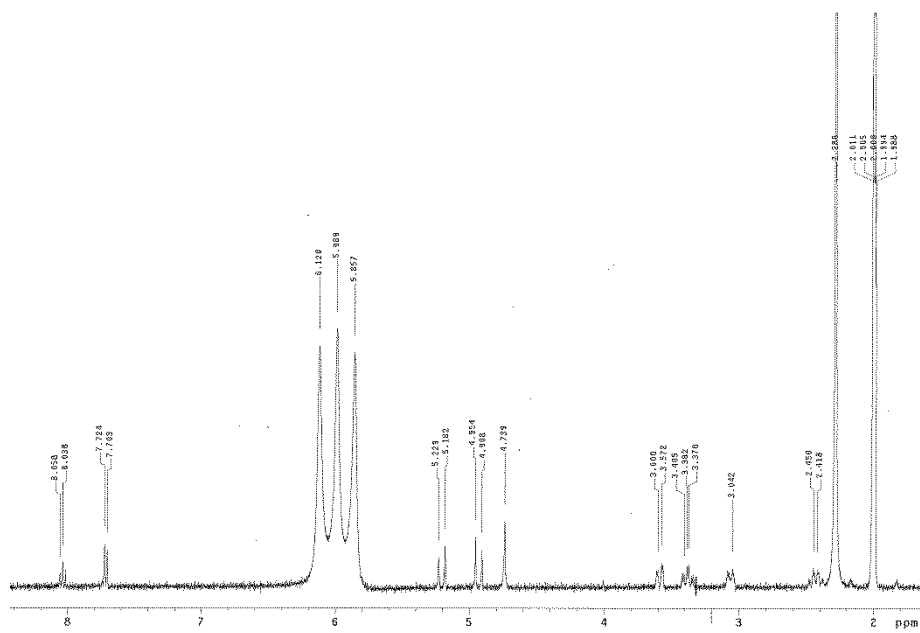

Figure S35. <sup>1</sup>H-NMR spectrum of [Rh(L<sup>3</sup>)Cl<sub>2</sub>](BF<sub>4</sub>)·MeCN recorded in CD<sub>3</sub>CN (400 MHz).

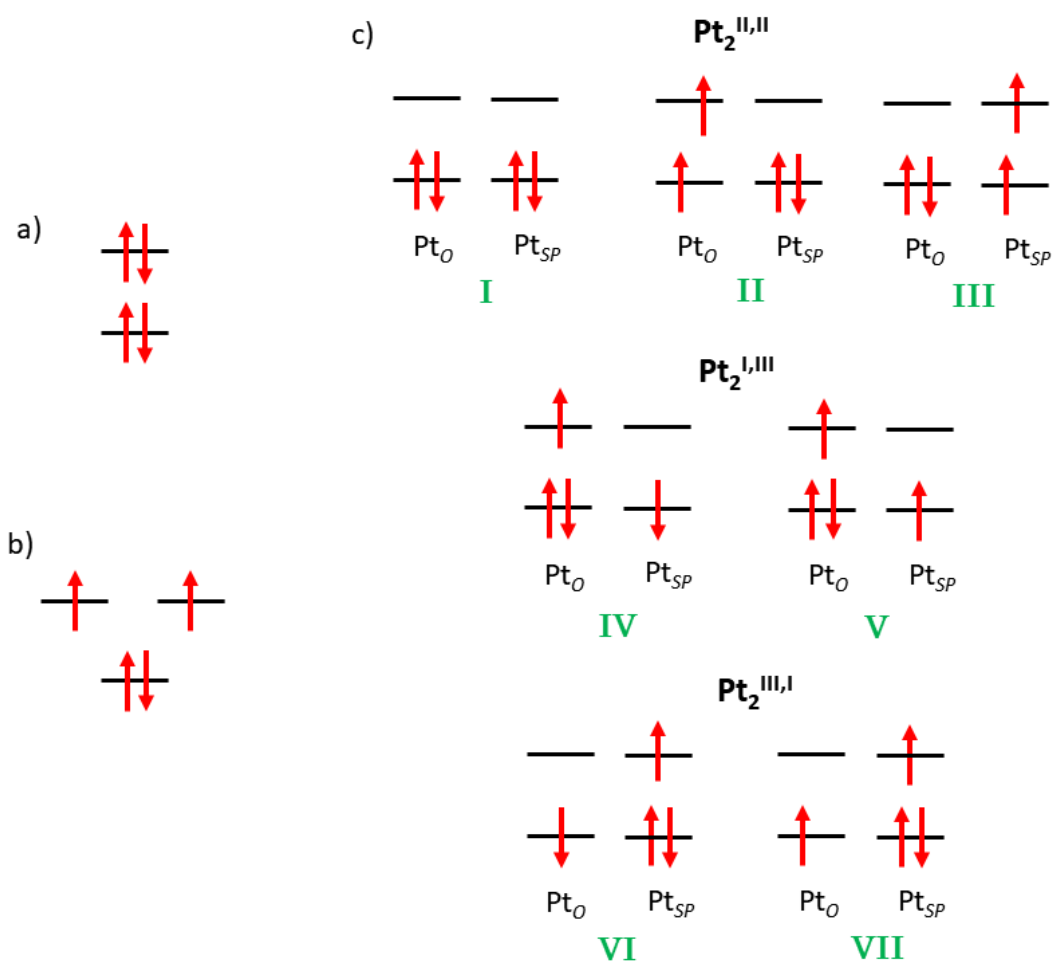

**Figure S36.** Schematic representation of the frontier molecular orbitals' electronic configuration for the closed-shell singlet state (a), triplet ground-state (b), and the different broken symmetry configurations (c) investigated at DFT level for  $[\text{Pt}(\text{L}^3)(\mu\text{-}1,3\text{-MeCONH})\text{PtCl}(\text{MeCN})]^{2+}$  and  $[\text{Pt}_2(\text{tfepma})_2\text{Cl}_4]$ , featuring different charges ( $Q = +1, +2, +3$ ) and spin multiplicities ( $2S + 1 = 1, 2, 3$ ) on the octahedral ( $\text{Pt}_O$ ) and square-planar ( $\text{Pt}_{SP}$ ) Pt ions.

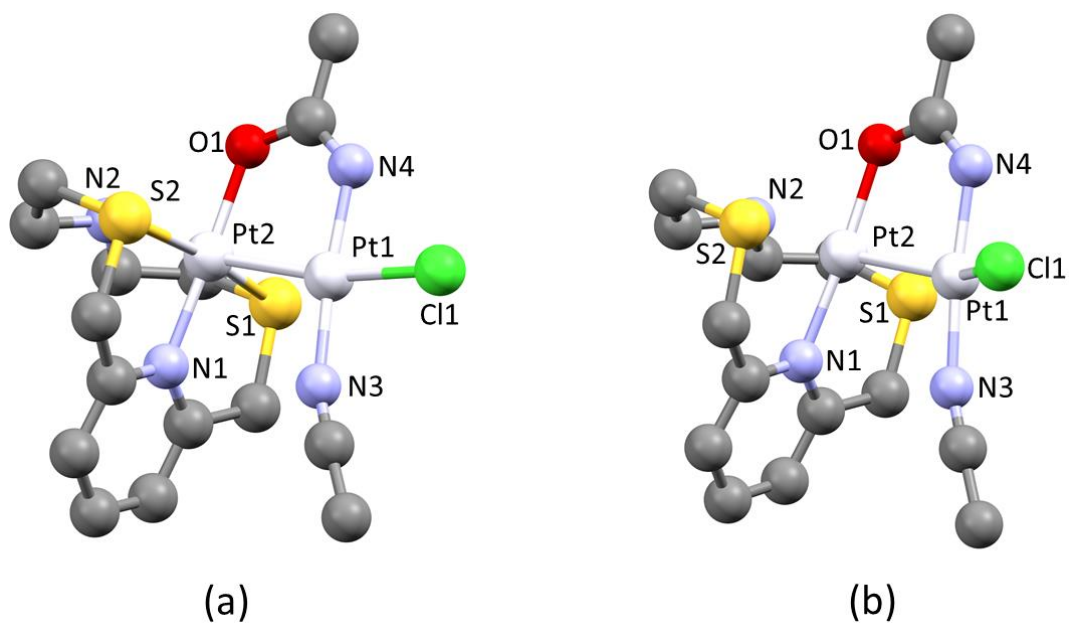

**Figure S37.** Molecular drawing and atom labelling scheme for the complex cation  $[\text{Pt}(\text{L}^3)(\mu\text{-1,3-MeCONH})\text{PtCl}(\text{MeCN})]^{2+}$  at the optimized geometry in its singlet (a) and triplet (b) state in the gas phase; hydrogen atoms were omitted for clarity.

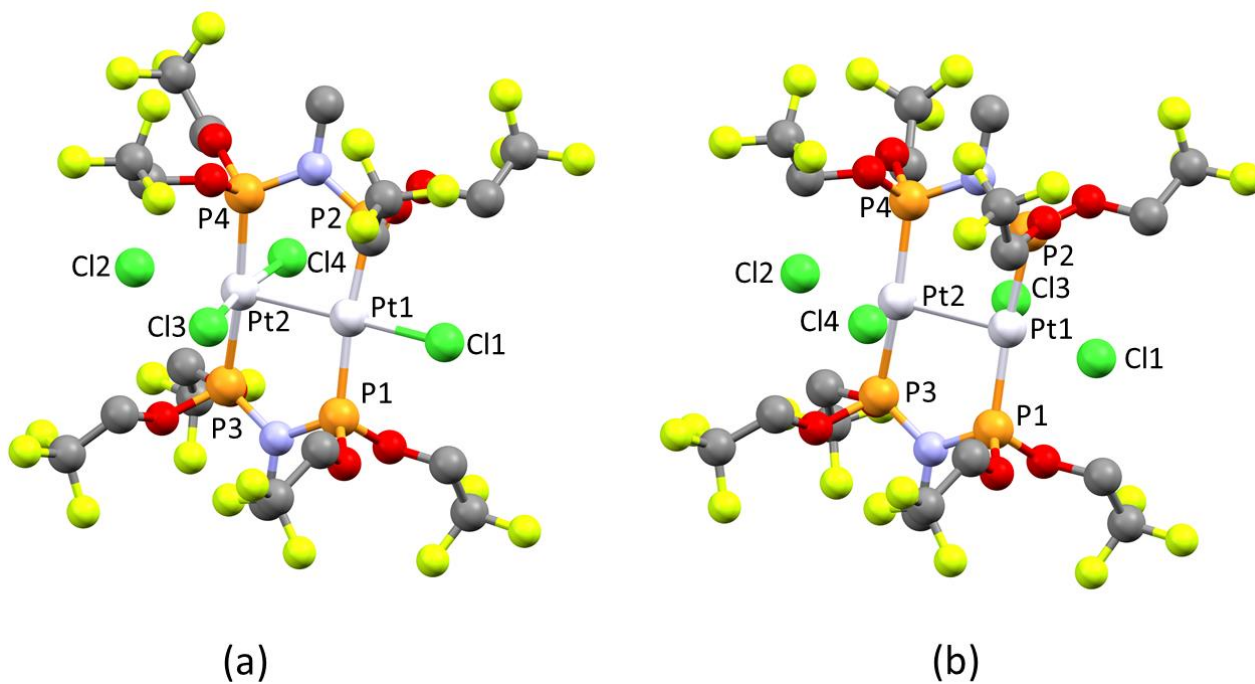

**Figure S38.** Molecular drawing and atom labelling scheme for  $[\text{Pt}_2(\text{tfepma})_2\text{Cl}_4]$  at the optimized geometry in its singlet (a) and triplet (b) state in the gas phase; hydrogen atoms were omitted for clarity.

**Table S1.** Optimized geometry in orthogonal Cartesian coordinate format calculated for [Pt(L<sup>3</sup>)(μ-1,3-MeCONH)PtCl(MeCN)]<sup>2+</sup> in its singlet ground-state (total charge = +2, spin multiplicity = 1) at DFT level in the gas phase.

| Atom number | Z  | X        | Y        | Z        |
|-------------|----|----------|----------|----------|
| 1           | 78 | 0.15426  | -0.13609 | -0.10323 |
| 2           | 78 | 1.91103  | 0.599047 | 1.706087 |
| 3           | 17 | -1.6203  | -0.90029 | -1.34738 |
| 4           | 16 | 3.026343 | -1.42381 | 1.662732 |
| 5           | 16 | 1.113347 | 2.764406 | 1.81966  |
| 6           | 8  | 0.612943 | -0.04575 | 3.090312 |
| 7           | 7  | -0.87376 | -0.66508 | 1.498386 |
| 8           | 7  | 3.262359 | 1.266112 | 0.376894 |
| 9           | 7  | 3.258235 | 1.145354 | 3.54997  |
| 10          | 7  | 1.005042 | 0.316047 | -1.8147  |
| 11          | 6  | 3.24966  | 2.569344 | 0.008907 |
| 12          | 6  | 4.266066 | 3.089337 | -0.78595 |
| 13          | 1  | 4.249778 | 4.143107 | -1.06624 |
| 14          | 6  | 5.290298 | 2.252173 | -1.21817 |
| 15          | 1  | 6.100661 | 2.645408 | -1.83436 |
| 16          | 6  | 5.263561 | 0.905633 | -0.8677  |
| 17          | 1  | 6.040556 | 0.222773 | -1.21301 |
| 18          | 6  | 4.227558 | 0.428528 | -0.07125 |
| 19          | 6  | 4.095979 | -1.03276 | 0.241356 |
| 20          | 1  | 5.069172 | -1.52441 | 0.377306 |
| 21          | 1  | 3.592897 | -1.53679 | -0.60158 |
| 22          | 6  | 4.10242  | -1.13256 | 3.135961 |
| 23          | 1  | 3.514849 | -1.58594 | 3.949775 |
| 24          | 1  | 5.000328 | -1.75495 | 3.010787 |
| 25          | 6  | 4.456112 | 0.316909 | 3.442355 |
| 26          | 1  | 5.054304 | 0.321372 | 4.370675 |
| 27          | 1  | 5.100155 | 0.737254 | 2.655556 |
| 28          | 6  | 3.41459  | 2.597203 | 3.527794 |
| 29          | 1  | 4.131659 | 2.857715 | 2.735024 |
| 30          | 1  | 3.836109 | 2.988411 | 4.470618 |
| 31          | 6  | 2.079932 | 3.295459 | 3.301827 |
| 32          | 1  | 2.19482  | 4.387411 | 3.240833 |
| 33          | 1  | 1.37571  | 3.097515 | 4.125216 |
| 34          | 6  | 2.06905  | 3.404592 | 0.407541 |
| 35          | 1  | 1.335037 | 3.405916 | -0.41643 |
| 36          | 1  | 2.339252 | 4.451913 | 0.601016 |
| 37          | 6  | -0.53498 | -0.55681 | 2.740779 |
| 38          | 6  | -1.40903 | -0.99786 | 3.866156 |
| 39          | 1  | -1.61975 | -0.14415 | 4.524802 |
| 40          | 1  | -0.88398 | -1.75454 | 4.465145 |
| 41          | 1  | -2.3548  | -1.41662 | 3.506067 |
| 42          | 6  | 1.204683 | 0.449343 | -2.94473 |
| 43          | 6  | 1.390587 | 0.587477 | -4.37227 |
| 44          | 1  | 1.527789 | 1.642212 | -4.64649 |
| 45          | 1  | 0.490293 | 0.205135 | -4.87604 |
| 50          | 1  | 2.258334 | 0.004525 | -4.70948 |
| 51          | 1  | 2.689975 | 0.85588  | 4.348386 |
| 52          | 1  | -1.78689 | -1.07481 | 1.305421 |

**Table S2.** Optimized geometry in orthogonal Cartesian coordinate format calculated for [Pt(L<sup>3</sup>)(μ-1,3-MeCONH)PtCl(MeCN)]<sup>2+</sup> in its triplet ground-state (total charge = +2, spin multiplicity = 3) at DFT level in the gas phase.

| Atom number | Z  | X        | Y        | Z        |
|-------------|----|----------|----------|----------|
| 1           | 78 | 0.072895 | -0.23203 | -0.06548 |
| 2           | 78 | 1.822549 | 0.526777 | 1.649945 |
| 3           | 17 | -1.89609 | 0.300763 | -1.14683 |
| 4           | 16 | 3.262613 | -1.62843 | 1.570325 |
| 5           | 16 | 1.022896 | 2.937261 | 1.9111   |
| 6           | 8  | 0.579843 | -0.18834 | 3.08535  |
| 7           | 7  | -0.98472 | -0.67732 | 1.542937 |
| 8           | 7  | 3.186659 | 1.28297  | 0.334166 |
| 9           | 7  | 3.159877 | 1.043451 | 3.334451 |
| 10          | 7  | 1.027512 | 0.078505 | -1.77309 |
| 11          | 6  | 3.147957 | 2.601802 | 0.029037 |
| 12          | 6  | 4.164269 | 3.187938 | -0.72167 |
| 13          | 1  | 4.118972 | 4.253124 | -0.95113 |
| 14          | 6  | 5.228234 | 2.409913 | -1.16348 |
| 15          | 1  | 6.038121 | 2.855668 | -1.74346 |
| 16          | 6  | 5.248246 | 1.057146 | -0.84545 |
| 17          | 1  | 6.070333 | 0.419807 | -1.17338 |
| 18          | 6  | 4.210108 | 0.508824 | -0.09457 |
| 19          | 6  | 4.219768 | -0.97684 | 0.175533 |
| 20          | 1  | 5.253372 | -1.34363 | 0.245109 |
| 21          | 1  | 3.772285 | -1.49277 | -0.69082 |
| 22          | 6  | 4.241334 | -1.19286 | 3.046723 |
| 23          | 1  | 3.692463 | -1.68809 | 3.863051 |
| 24          | 1  | 5.219979 | -1.68972 | 2.980004 |
| 25          | 6  | 4.425523 | 0.289259 | 3.30909  |
| 26          | 1  | 4.95962  | 0.410261 | 4.266803 |
| 27          | 1  | 5.065801 | 0.740601 | 2.53731  |
| 28          | 6  | 3.378293 | 2.498413 | 3.434745 |
| 29          | 1  | 4.078992 | 2.783753 | 2.636944 |
| 30          | 1  | 3.874479 | 2.744116 | 4.389028 |
| 31          | 6  | 2.100026 | 3.309792 | 3.335789 |
| 32          | 1  | 2.331049 | 4.384766 | 3.334843 |
| 33          | 1  | 1.437195 | 3.132945 | 4.197398 |
| 34          | 6  | 1.971237 | 3.445246 | 0.451042 |
| 35          | 1  | 1.211418 | 3.421358 | -0.34914 |
| 36          | 1  | 2.271093 | 4.496457 | 0.56061  |
| 37          | 6  | -0.60042 | -0.60031 | 2.785727 |
| 38          | 6  | -1.49078 | -0.9839  | 3.918898 |
| 39          | 1  | -1.64139 | -0.11544 | 4.574901 |
| 40          | 1  | -1.00156 | -1.76582 | 4.515631 |
| 41          | 1  | -2.46463 | -1.34957 | 3.575935 |
| 42          | 6  | 1.296008 | 0.168942 | -2.89215 |
| 43          | 6  | 1.587819 | 0.266962 | -4.3041  |
| 44          | 1  | 2.389185 | 0.99553  | -4.48617 |
| 45          | 1  | 0.679708 | 0.592192 | -4.83278 |
| 50          | 1  | 1.891352 | -0.7154  | -4.69276 |
| 51          | 1  | 2.590933 | 0.727185 | 4.126365 |
| 52          | 1  | -1.94819 | -0.96099 | 1.38201  |



**Table S3.** Selected optimized bond lengths (Å) and angles (°) calculated in the gas phase for [Pt(L<sup>3</sup>)(μ-1,3-MeCONH)PtCl(MeCN)]<sup>2+</sup> at the optimized geometry in its singlet and triplet state, and corresponding crystal structure data (atom labelling scheme as in Figures 7 and S37).

|                | Optimized values |               | Experimental values |
|----------------|------------------|---------------|---------------------|
|                | Singlet state    | Triplet state |                     |
| Pt1-Pt2        | 2.627            | 2.565         | 2.580               |
| Pt1-N3         | 1.964            | 1.981         | 1.972               |
| Pt1-Cl1        | 2.298            | 2.309         | 2.343               |
| Pt1-N4         | 1.975            | 1.976         | 1.981               |
| Pt2-N1         | 2.009            | 2.041         | 2.006               |
| Pt2-S1         | 2.310            | 2.593         | 2.293               |
| Pt2-N2         | 2.348            | 2.212         | 2.237               |
| Pt2-O1         | 2.004            | 2.029         | 2.018               |
| Pt2-S2         | 2.310            | 2.553         | 2.307               |
| N3-Pt1-N4      | 173.54           | 174.31        | 176.45              |
| N3-Pt1-Cl1     | 86.52            | 88.34         | 89.14               |
| N3-Pt1-Pt2     | 104.24           | 101.62        | 98.41               |
| Cl1-Pt1-N4     | 87.02            | 88.67         | 89.37               |
| Cl1-Pt1-Pt2    | 169.24           | 145.76        | 172.43              |
| N4-Pt1-Pt2     | 82.21            | 83.53         | 83.13               |
| Pt1-Pt2-N1     | 94.99            | 97.72         | 94.44               |
| Pt1-Pt2-S1     | 93.73            | 96.45         | 94.19               |
| Pt1-Pt2-N2     | 171.78           | 172.20        | 173.63              |
| Pt1-Pt2-O1     | 87.28            | 87.20         | 86.86               |
| Pt1-Pt2-S2     | 93.74            | 96.45         | 93.17               |
| N1-Pt2-S1      | 87.34            | 85.24         | 87.28               |
| N1-Pt2-N2      | 93.23            | 90.02         | 91.82               |
| N1-Pt2-O1      | 177.73           | 175.07        | 177.97              |
| N1-Pt2-S2      | 87.34            | 85.72         | 86.97               |
| S1-Pt2-N2      | 86.64            | 83.21         | 87.27               |
| S1-Pt2-O1      | 92.52            | 93.95         | 91.08               |
| S1-Pt2-S2      | 171.18           | 164.10        | 170.77              |
| N2-Pt2-O1      | 84.50            | 85.06         | 86.92               |
| N2-Pt2-S2      | 86.64            | 83.21         | 86.01               |
| O1-Pt2-S2      | 92.52            | 93.95         | 94.87               |
| Cl1-Pt1-Pt2-N2 | 0.06             | 89.51         | 1.99                |

**Table S4.** Optimized geometry in orthogonal Cartesian coordinate format calculated for [Pt<sub>2</sub>(tfepma)<sub>2</sub>Cl<sub>4</sub>] in its singlet state (total charge = 0, spin multiplicity = 1) at DFT level in the gas phase.

| Atom number | Z  | X        | Y        | Z        |
|-------------|----|----------|----------|----------|
| 1           | 78 | -0.20338 | 1.498997 | 0.007132 |
| 2           | 78 | 0.125678 | -1.09874 | -0.21499 |
| 3           | 17 | -0.53461 | 3.831899 | 0.398239 |
| 4           | 17 | 0.457791 | -3.58112 | -0.35758 |
| 5           | 17 | -0.03361 | -0.77024 | -2.54063 |
| 6           | 17 | 0.201757 | -1.05525 | 2.152832 |
| 7           | 15 | -2.42728 | 1.352723 | -0.3607  |
| 8           | 15 | 2.013255 | 1.88053  | 0.288263 |
| 9           | 15 | -2.13774 | -1.513   | -0.17825 |
| 10          | 15 | 2.417197 | -0.92278 | -0.32338 |
| 11          | 8  | -3.36362 | 2.090889 | 0.744474 |
| 12          | 8  | -3.02888 | 2.038421 | -1.68522 |
| 13          | 8  | 2.714795 | 2.927971 | -0.71443 |
| 14          | 8  | 2.443475 | 2.568483 | 1.698655 |
| 15          | 8  | -2.75946 | -2.00257 | 1.221045 |
| 16          | 8  | -2.71869 | -2.67642 | -1.11902 |
| 17          | 8  | 3.074306 | -1.13942 | -1.76942 |
| 18          | 8  | 3.306539 | -1.9687  | 0.510281 |
| 19          | 6  | -3.06013 | 2.029106 | 2.12238  |
| 20          | 1  | -2.31694 | 2.795893 | 2.382363 |
| 21          | 1  | -2.68365 | 1.038783 | 2.422219 |
| 22          | 6  | -4.33855 | 2.296767 | 2.885593 |
| 23          | 6  | -3.16245 | 3.431885 | -1.87398 |
| 24          | 1  | -2.18307 | 3.912992 | -1.99991 |
| 25          | 1  | -3.68673 | 3.896181 | -1.02781 |
| 26          | 6  | -3.98729 | 3.635761 | -3.12532 |
| 27          | 6  | 2.639746 | 4.334693 | -0.63627 |
| 28          | 1  | 2.664226 | 4.679303 | 0.405698 |
| 29          | 1  | 1.725129 | 4.704533 | -1.11733 |
| 30          | 6  | 3.847602 | 4.895512 | -1.3546  |
| 31          | 6  | 1.804657 | 2.252333 | 2.917053 |
| 32          | 1  | 1.029393 | 1.480581 | 2.792072 |
| 33          | 1  | 1.348181 | 3.160661 | 3.331707 |
| 34          | 6  | 2.834317 | 1.731652 | 3.897103 |
| 35          | 6  | -2.48647 | -3.27137 | 1.788943 |
| 36          | 1  | -1.42604 | -3.35964 | 2.060688 |
| 37          | 1  | -2.75845 | -4.07644 | 1.092804 |
| 38          | 6  | -3.33492 | -3.39241 | 3.034337 |
| 39          | 6  | -2.2878  | -3.14187 | -2.38279 |
| 40          | 1  | -1.26288 | -3.53037 | -2.31854 |
| 41          | 1  | -2.33847 | -2.35093 | -3.14151 |
| 42          | 6  | -3.23357 | -4.25658 | -2.76906 |
| 43          | 6  | 3.165156 | -2.39391 | -2.41731 |
| 44          | 1  | 2.206977 | -2.655   | -2.88547 |
| 45          | 1  | 3.461559 | -3.18303 | -1.71353 |
| 50          | 6  | 4.231172 | -2.27059 | -3.483   |
| 51          | 6  | 3.038677 | -2.63864 | 1.726221 |
| 52          | 1  | 2.13179  | -3.25078 | 1.635814 |
| 53          | 1  | 2.932341 | -1.93132 | 2.557803 |
| 54          | 6  | 4.228534 | -3.53221 | 1.994258 |
| 55          | 6  | -4.56391 | -0.33295 | -0.65039 |
| 56          | 1  | -4.77371 | -1.30687 | -1.1062  |
| 57          | 1  | -4.93064 | 0.454456 | -1.31834 |

|    |   |          |          |          |
|----|---|----------|----------|----------|
| 58 | 1 | -5.06483 | -0.26165 | 0.32297  |
| 59 | 6 | 4.515465 | 0.735921 | 0.175543 |
| 60 | 1 | 4.887155 | 0.358244 | 1.135271 |
| 61 | 1 | 4.760705 | 1.797774 | 0.070844 |
| 62 | 1 | 4.988062 | 0.190014 | -0.64961 |
| 63 | 9 | -5.26412 | 1.370924 | 2.628862 |
| 64 | 9 | -4.8536  | 3.484032 | 2.578434 |
| 65 | 9 | -4.08125 | 2.276465 | 4.192612 |
| 66 | 9 | -4.16798 | 4.942179 | -3.31891 |
| 67 | 9 | -5.18622 | 3.061092 | -3.01517 |
| 68 | 9 | -3.39048 | 3.13226  | -4.20084 |
| 69 | 9 | 3.818801 | 6.226277 | -1.27905 |
| 70 | 9 | 4.985002 | 4.473119 | -0.79608 |
| 71 | 9 | 3.87035  | 4.549645 | -2.63695 |
| 72 | 9 | 3.426025 | 0.621424 | 3.435216 |
| 73 | 9 | 3.790265 | 2.623639 | 4.135706 |
| 74 | 9 | 2.239699 | 1.43376  | 5.049542 |
| 75 | 9 | -3.05362 | -2.43715 | 3.917764 |
| 76 | 9 | -4.63441 | -3.31459 | 2.751007 |
| 77 | 9 | -3.10254 | -4.57339 | 3.606766 |
| 78 | 9 | -3.21779 | -5.24833 | -1.88088 |
| 79 | 9 | -4.49162 | -3.81816 | -2.86432 |
| 80 | 9 | -2.87443 | -4.74661 | -3.95354 |
| 81 | 9 | 3.918362 | -1.35834 | -4.39752 |
| 82 | 9 | 4.372224 | -3.44629 | -4.09557 |
| 83 | 9 | 5.408924 | -1.93222 | -2.95467 |
| 84 | 9 | 4.021493 | -4.20883 | 3.122914 |

---

**Table S5.** Optimized geometry in orthogonal Cartesian coordinate format calculated for [Pt<sub>2</sub>(tfepma)<sub>2</sub>Cl<sub>4</sub>] in its triplet state (total charge = 0, spin multiplicity = 3) at DFT level in the gas phase.

| Atom number | Z  | X        | Y        | Z        |
|-------------|----|----------|----------|----------|
| 1           | 78 | -0.33478 | 1.433065 | 0.074816 |
| 2           | 78 | 0.2378   | -1.11515 | -0.2275  |
| 3           | 17 | -0.86437 | 3.634582 | 0.929841 |
| 4           | 17 | 0.789283 | -3.4206  | -0.78217 |
| 5           | 17 | -0.08861 | 0.96222  | -2.39629 |
| 6           | 17 | 0.101324 | -1.20885 | 2.304749 |
| 7           | 15 | -2.58939 | 1.072686 | -0.02708 |
| 8           | 15 | 1.86924  | 2.002657 | 0.322727 |
| 9           | 15 | -1.96694 | -1.71054 | -0.40235 |
| 10          | 15 | 2.496071 | -0.73186 | -0.3485  |
| 11          | 8  | -3.40961 | 1.483671 | 1.310518 |
| 12          | 8  | -3.4178  | 1.928205 | -1.10251 |
| 13          | 8  | 2.419498 | 3.191181 | -0.60637 |
| 14          | 8  | 2.253396 | 2.622697 | 1.774973 |
| 15          | 8  | -2.60053 | -2.63412 | 0.744477 |
| 16          | 8  | -2.31966 | -2.61061 | -1.69816 |
| 17          | 8  | 3.155028 | -0.93397 | -1.80441 |
| 18          | 8  | 3.485711 | -1.66401 | 0.519317 |
| 19          | 6  | -2.93417 | 1.175199 | 2.60701  |
| 20          | 1  | -2.49219 | 2.073368 | 3.058828 |
| 21          | 1  | -2.18259 | 0.369068 | 2.601439 |
| 22          | 6  | -4.10904 | 0.725473 | 3.447893 |
| 23          | 6  | -3.70883 | 3.306346 | -0.99767 |
| 24          | 1  | -2.82089 | 3.915018 | -1.2136  |
| 25          | 1  | -4.08615 | 3.556648 | 0.002724 |
| 26          | 6  | -4.78744 | 3.614302 | -2.01303 |
| 27          | 6  | 2.121661 | 4.562487 | -0.45222 |
| 28          | 1  | 2.162824 | 4.862558 | 0.603063 |
| 29          | 1  | 1.128553 | 4.797204 | -0.85705 |
| 30          | 6  | 3.171364 | 5.339935 | -1.21612 |
| 31          | 6  | 1.72857  | 2.114017 | 2.984027 |
| 32          | 1  | 1.074813 | 1.240466 | 2.826517 |
| 33          | 1  | 1.15954  | 2.905289 | 3.488948 |
| 34          | 6  | 2.87158  | 1.682712 | 3.877362 |
| 35          | 6  | -2.04325 | -3.85174 | 1.201617 |
| 36          | 1  | -1.0981  | -3.66646 | 1.729796 |
| 37          | 1  | -1.87665 | -4.55278 | 0.373018 |
| 38          | 6  | -3.03641 | -4.46091 | 2.166123 |
| 39          | 6  | -1.7611  | -2.35985 | -2.97474 |
| 40          | 1  | -0.80961 | -2.89919 | -3.0773  |
| 41          | 1  | -1.58911 | -1.28717 | -3.14903 |
| 42          | 6  | -2.73672 | -2.86927 | -4.01161 |
| 43          | 6  | 3.58663  | -2.16333 | -2.348   |
| 44          | 1  | 2.753616 | -2.69006 | -2.83127 |
| 45          | 1  | 4.024125 | -2.81003 | -1.5762  |
| 50          | 6  | 4.649567 | -1.8569  | -3.38007 |
| 51          | 6  | 3.171461 | -2.47244 | 1.636538 |
| 52          | 1  | 2.278089 | -3.08099 | 1.445267 |
| 53          | 1  | 3.016876 | -1.86285 | 2.535216 |
| 54          | 6  | 4.354755 | -3.38688 | 1.859964 |
| 55          | 6  | -4.53786 | -0.77889 | -0.57782 |
| 56          | 1  | -4.6593  | -1.5152  | -1.38019 |
| 57          | 1  | -5.06377 | 0.137389 | -0.86592 |

|    |   |          |          |          |
|----|---|----------|----------|----------|
| 58 | 1 | -4.94677 | -1.17027 | 0.361058 |
| 59 | 6 | 4.460031 | 1.135116 | 0.017559 |
| 60 | 1 | 4.90738  | 0.812762 | 0.965269 |
| 61 | 1 | 4.594393 | 2.213738 | -0.11406 |
| 62 | 1 | 4.944962 | 0.62149  | -0.82054 |
| 63 | 9 | -4.669   | -0.3791  | 2.952505 |
| 64 | 9 | -5.05129 | 1.662971 | 3.517407 |
| 65 | 9 | -3.68839 | 0.462919 | 4.683789 |
| 66 | 9 | -5.11477 | 4.903126 | -1.92023 |
| 67 | 9 | -5.88469 | 2.888608 | -1.7897  |
| 68 | 9 | -4.38393 | 3.373084 | -3.25548 |
| 69 | 9 | 2.942084 | 6.644168 | -1.06193 |
| 70 | 9 | 4.397598 | 5.076415 | -0.75886 |
| 71 | 9 | 3.150999 | 5.061664 | -2.51435 |
| 72 | 9 | 3.577435 | 0.691185 | 3.313634 |
| 73 | 9 | 3.713742 | 2.679359 | 4.128338 |
| 74 | 9 | 2.388301 | 1.23788  | 5.033923 |
| 75 | 9 | -3.26664 | -3.66408 | 3.205691 |
| 76 | 9 | -4.20422 | -4.71067 | 1.575954 |
| 77 | 9 | -2.54465 | -5.61366 | 2.622178 |
| 78 | 9 | -2.96193 | -4.1733  | -3.88119 |
| 79 | 9 | -3.9127  | -2.24214 | -3.92429 |
| 80 | 9 | -2.23827 | -2.64931 | -5.22701 |
| 81 | 9 | 4.180207 | -1.10754 | -4.37179 |
| 82 | 9 | 5.098068 | -3.00138 | -3.89564 |
| 83 | 9 | 5.685132 | -1.21292 | -2.83534 |
| 84 | 9 | 4.099463 | -4.19108 | 2.889938 |

---

**Table S6.** Selected optimized bond lengths (Å) and angles (°) calculated in the gas phase for [Pt<sub>2</sub>(tfepma)<sub>2</sub>Cl<sub>4</sub>] at the optimized geometry in its singlet and triplet state, and corresponding crystal structure data (atom labelling scheme as in Figure S38).

|                 | Optimized values |               | Experimental values <sup>a</sup> |
|-----------------|------------------|---------------|----------------------------------|
|                 | Singlet state    | Triplet state |                                  |
| Pt1-Pt2         | 2.628            | 2.629         | 2.619                            |
| Pt1-Cl1         | 2.388            | 2.420         | 2.354                            |
| Pt1-P1          | 2.267            | 2.290         | 2.252                            |
| Pt1-P2          | 2.259            | 2.285         | 2.250                            |
| Pt1-Cl3         | /                | 2.528         | /                                |
| Pt2-Cl2         | 2.509            | 2.434         | 2.500                            |
| Pt2-Cl3         | 2.354            | 3.021         | 2.323                            |
| Pt2-Cl4         | 2.369            | 2.538         | 2.338                            |
| Pt2-P3          | 2.301            | 2.294         | 2.294                            |
| Pt2-P4          | 2.301            | 2.290         | 2.295                            |
| Cl1-Pt1-P1      | 87.19            | 86.91         | 87.04                            |
| Cl1-Pt1-Pt2     | 175.34           | 165.89        | 173.39                           |
| Cl1-Pt1-P2      | 87.33            | 86.75         | 87.97                            |
| Cl1-Pt1-Cl3     | /                | 122.42        | /                                |
| P1-Pt1-Pt2      | 93.12            | 92.52         | 92.97                            |
| P1-Pt1-P2       | 173.65           | 173.48        | 172.92                           |
| P1-Pt1-Cl3      | /                | 93.35         | /                                |
| P2-Pt1-Pt2      | 92.61            | 93.26         | 92.57                            |
| P2-Pt1-Cl3      | /                | 91.32         | /                                |
| Cl2-Pt2-Cl3     | 95.21            | /             | 93.66                            |
| Cl2-Pt2-Cl4     | 94.06            | 101.80        | 96.60                            |
| Cl2-Pt2-Pt1     | 178.36           | 173.39        | 177.95                           |
| Cl2-Pt2-P3      | 86.63            | 85.60         | 87.02                            |
| Cl2-Pt2-P4      | 87.30            | 87.39         | 88.30                            |
| Cl3-Pt2-Cl4     | 170.69           | /             | 169.73                           |
| Cl3-Pt2-Pt1     | 86.40            | 71.69         | 87.94                            |
| Cl3-Pt2-P3      | 90.58            | /             | 89.07                            |
| Cl3-Pt2-P4      | 88.53            | /             | 92.14                            |
| Cl4-Pt2-Pt1     | 84.34            | 84.80         | 81.80                            |
| Cl4-Pt2-P3      | 90.78            | 96.42         | 91.12                            |
| Cl4-Pt2-P4      | 91.08            | 90.85         | 88.51                            |
| P3-Pt2-Pt1      | 93.04            | 93.35         | 91.72                            |
| P3-Pt2-P4       | 173.76           | 170.79        | 175.24                           |
| P4-Pt2-Pt1      | 93.06            | 92.93         | 92.92                            |
| Cl1-Pt1-Pt2-Cl2 | 24.67            | 176.62        | 27.08                            |

<sup>a</sup> Taken from Refs. 46, 47 in the main text of the paper.

**Table S7.** Details of X-ray data collection and refinement for [Pd(L<sup>1</sup>)Cl]<sub>2</sub>[Pd<sub>2</sub>Cl<sub>6</sub>], [Pt(L<sup>1</sup>)Cl](BF<sub>4</sub>) and [Rh(L<sup>1</sup>)Cl<sub>2</sub>](PF<sub>6</sub>).

| Complex                                                      | [Pd(L <sup>1</sup> )Cl] <sub>2</sub> [Pd <sub>2</sub> Cl <sub>6</sub> ]          | [Pt(L <sup>1</sup> )Cl](BF <sub>4</sub> )                            | [Rh(L <sup>1</sup> )Cl <sub>2</sub> ](PF <sub>6</sub> )                            |
|--------------------------------------------------------------|----------------------------------------------------------------------------------|----------------------------------------------------------------------|------------------------------------------------------------------------------------|
| Empirical formula                                            | C <sub>11</sub> H <sub>15</sub> Cl <sub>4</sub> NOPd <sub>2</sub> S <sub>2</sub> | C <sub>11</sub> H <sub>15</sub> BClF <sub>4</sub> NOPtS <sub>2</sub> | C <sub>11</sub> H <sub>15</sub> Cl <sub>2</sub> F <sub>6</sub> NOPRhS <sub>2</sub> |
| Formula weight                                               | 595.96                                                                           | 558.71                                                               | 560.14                                                                             |
| Temperature/K                                                | 294(2)                                                                           | 150(2)                                                               | 294(2)                                                                             |
| Crystal system                                               | Monoclinic                                                                       | Triclinic                                                            | Monoclinic                                                                         |
| Space group                                                  | <i>P</i> 2 <sub>1</sub> / <i>n</i>                                               | <i>P</i> -1                                                          | <i>P</i> 2 <sub>1</sub> / <i>c</i>                                                 |
| <i>a</i> /Å                                                  | 10.9866(6)                                                                       | 9.0592(14)                                                           | 9.9357(10)                                                                         |
| <i>b</i> /Å                                                  | 12.5513(6)                                                                       | 10.087(2)                                                            | 12.309(3)                                                                          |
| <i>c</i> /Å                                                  | 13.8633(7)                                                                       | 10.111(2)                                                            | 14.771(3)                                                                          |
| $\alpha$ /°                                                  | 90                                                                               | 69.856(2)                                                            | 90                                                                                 |
| $\beta$ /°                                                   | 110.060(10)                                                                      | 69.238(2)                                                            | 92.550(10)                                                                         |
| $\gamma$ /°                                                  | 90                                                                               | 74.787(2)                                                            | 90                                                                                 |
| Volume/Å <sup>3</sup>                                        | 1795.72(19)                                                                      | 800.7(4)                                                             | 1804.8(6)                                                                          |
| <i>Z</i>                                                     | 4                                                                                | 2                                                                    | 4                                                                                  |
| $\rho_{\text{calc}}$ /cm <sup>3</sup>                        | 2.204                                                                            | 2.317                                                                | 2.062                                                                              |
| $\mu$ /mm <sup>-1</sup>                                      | 2.825                                                                            | 9.228                                                                | 1.622                                                                              |
| <i>F</i> (000)                                               | 1152                                                                             | 528                                                                  | 1104                                                                               |
| Crystal size/mm <sup>3</sup>                                 | 0.14 × 0.09 × 0.04                                                               | 0.84 × 0.26 × 0.06                                                   | 0.21 × 0.10 × 0.09                                                                 |
| Radiation                                                    | MoK $\alpha$ ( $\lambda$ = 0.71073)                                              | MoK $\alpha$ ( $\lambda$ = 0.71073)                                  | MoK $\alpha$ ( $\lambda$ = 0.71073)                                                |
| 2 $\Theta$ range for data collection/°                       | 4.110 to 58.566                                                                  | 4.36 to 52.74                                                        | 6.036 to 49.978                                                                    |
| Reflections collected                                        | 21966                                                                            | 6703                                                                 | 3166                                                                               |
| Unique reflections/ <i>R</i> <sub>int</sub>                  | 4527/0.0225                                                                      | 3224/0.031                                                           | 3166/0.0000                                                                        |
| Observed reflections [ <i>I</i> > 2 $\sigma$ ( <i>I</i> )]   | 3485                                                                             | 3118                                                                 | 2319                                                                               |
| Data/restraints/parameters                                   | 4527/0/190                                                                       | 3224/21/199                                                          | 3166/0/226                                                                         |
| Goodness-of-fit on <i>F</i> <sup>2</sup>                     | 1.033                                                                            | 1.05                                                                 | 1.050                                                                              |
| Final <i>R</i> indexes [ <i>I</i> > 2 $\sigma$ ( <i>I</i> )] | <i>R</i> <sub>1</sub> = 0.0297, <i>wR</i> <sub>2</sub> = 0.0853                  | <i>R</i> <sub>1</sub> = 0.0302, <i>wR</i> <sub>2</sub> = 0.0802      | <i>R</i> <sub>1</sub> = 0.0272, <i>wR</i> <sub>2</sub> = 0.0673                    |
| Final <i>R</i> indexes [all data]                            | <i>R</i> <sub>1</sub> = 0.0417, <i>wR</i> <sub>2</sub> = 0.0873                  | <i>R</i> <sub>1</sub> = 0.0313, <i>wR</i> <sub>2</sub> = 0.0812      | <i>R</i> <sub>1</sub> = 0.0568, <i>wR</i> <sub>2</sub> = 0.0725                    |
| Largest diff. peak/hole / e Å <sup>-3</sup>                  | 0.818/-1.369                                                                     | 1.78/-1.36                                                           | 0.496/-0.537                                                                       |

**Table S8.** Details of X-ray data collection and refinement for [Pt(L<sup>3</sup>)(μ-1,3-MeCONH)PtCl(MeCN)](BF<sub>4</sub>)<sub>2</sub>·H<sub>2</sub>O and [Rh(L<sup>3</sup>)Cl<sub>2</sub>](BF<sub>4</sub>)·MeCN.

| Complex                                                      | [Pt(L <sup>3</sup> )(μ-1,3-MeCONH)PtCl(MeCN)](BF <sub>4</sub> ) <sub>2</sub> ·H <sub>2</sub> O                               | [Rh(L <sup>3</sup> )Cl <sub>2</sub> ](BF <sub>4</sub> )·MeCN                      |
|--------------------------------------------------------------|------------------------------------------------------------------------------------------------------------------------------|-----------------------------------------------------------------------------------|
| Empirical formula                                            | C <sub>15</sub> H <sub>25</sub> B <sub>2</sub> ClF <sub>8</sub> N <sub>4</sub> O <sub>2</sub> Pt <sub>2</sub> S <sub>2</sub> | C <sub>13</sub> H <sub>19</sub> BCl <sub>2</sub> F <sub>4</sub> NRhS <sub>2</sub> |
| Formula weight                                               | 956.76                                                                                                                       | 542.05                                                                            |
| Temperature/K                                                | 291(2)                                                                                                                       | 150(2)                                                                            |
| Crystal system                                               | Monoclinic                                                                                                                   | Monoclinic                                                                        |
| Space group                                                  | <i>P</i> 2 <sub>1</sub> / <i>n</i>                                                                                           | <i>P</i> 2 <sub>1</sub> / <i>n</i>                                                |
| <i>a</i> /Å                                                  | 13.3760(11)                                                                                                                  | 7.0301(7)                                                                         |
| <i>b</i> /Å                                                  | 11.0568(9)                                                                                                                   | 29.579(3)                                                                         |
| <i>c</i> /Å                                                  | 17.6337(14)                                                                                                                  | 9.2899(9)                                                                         |
| <i>α</i> /°                                                  | 90                                                                                                                           | 90                                                                                |
| <i>β</i> /°                                                  | 95.170(10)                                                                                                                   | 90.476(2)                                                                         |
| <i>γ</i> /°                                                  | 90                                                                                                                           | 90                                                                                |
| Volume/Å <sup>3</sup>                                        | 2597.3(4)                                                                                                                    | 1931.7(6)                                                                         |
| <i>Z</i>                                                     | 4                                                                                                                            | 4                                                                                 |
| <i>ρ</i> <sub>calc</sub> /cm <sup>3</sup>                    | 2.447                                                                                                                        | 1.864                                                                             |
| <i>μ</i> /mm <sup>-1</sup>                                   | 11.103                                                                                                                       | 1.417                                                                             |
| <i>F</i> (000)                                               | 1784                                                                                                                         | 1080                                                                              |
| Crystal size/mm <sup>3</sup>                                 | 0.20 × 0.07 × 0.05                                                                                                           | 0.48 × 0.17 × 0.06                                                                |
| Radiation                                                    | MoK $\alpha$ ( $\lambda$ = 0.71073)                                                                                          | MoK $\alpha$ ( $\lambda$ = 0.71073)                                               |
| 2 $\Theta$ range for data collection/°                       | 4.00 to 56.04                                                                                                                | 4.60 to 55.60                                                                     |
| Reflections collected                                        | 26897                                                                                                                        | 16408                                                                             |
| Independent reflections/ <i>R</i> <sub>int</sub>             | 6137/ 0.0379                                                                                                                 | 4528/0.032                                                                        |
| Observed reflections [ <i>I</i> ≥ 2 $\sigma$ ( <i>I</i> )]   | 4831                                                                                                                         | 4148                                                                              |
| Data/restraints/parameters                                   | 6137/3/344                                                                                                                   | 4421/0/237                                                                        |
| Goodness-of-fit on <i>F</i> <sup>2</sup>                     | 0.692                                                                                                                        | 1.15                                                                              |
| Final <i>R</i> indexes [ <i>I</i> ≥ 2 $\sigma$ ( <i>I</i> )] | <i>R</i> <sub>1</sub> = 0.0209, <i>wR</i> <sub>2</sub> = 0.0403                                                              | <i>R</i> <sub>1</sub> = 0.0539, <i>wR</i> <sub>2</sub> = 0.136                    |
| Final <i>R</i> indexes [all data]                            | <i>R</i> <sub>1</sub> = 0.0285, <i>wR</i> <sub>2</sub> = 0.0410                                                              | <i>R</i> <sub>1</sub> = 0.0568, <i>wR</i> <sub>2</sub> = 0.138                    |
| Largest diff. peak/hole / e Å <sup>-3</sup>                  | 1.482/-0.976                                                                                                                 | 1.67/-2.28                                                                        |
